# 1 **KSR1- and ERK-dependent Translational Regulation of** 2 **the Epithelial-to-Mesenchymal Transition**

3 Chaitra Rao<sup>1</sup>, Danielle E. Frodyma<sup>1</sup>, Siddesh Southeikal<sup>2</sup>, Robert A. Svoboda<sup>3</sup>, Adrian R. Black<sup>1</sup>,  
4 Chittibabu Guda<sup>2</sup>, Tomohiro Mizutani<sup>5</sup>, Hans Clevers<sup>5</sup>, Keith R. Johnson<sup>1,4</sup>, Kurt W. Fisher<sup>3</sup>, and  
5 Robert E. Lewis<sup>1\*</sup>

6 <sup>1</sup> Eppley Institute, Fred & Pamela Buffett Cancer Center, University of Nebraska Medical Center, Omaha, NE 68198, USA.

7 <sup>2</sup> Department of Genetics, Cell Biology and Anatomy, University of Nebraska Medical Center, Omaha, NE, University of  
8 Nebraska Medical Center, Omaha, NE 68198, USA.

9 <sup>3</sup> Department of Pathology and Microbiology, University of Nebraska Medical Center, Omaha, NE 68198, USA.

10 <sup>4</sup> Department of Oral Biology, University of Nebraska Medical Center, Omaha, NE 68198, USA

11 <sup>5</sup> Hubrecht Institute, Royal Netherlands Academy of Arts and Sciences (KNAW) and UMC Utrecht, 3584CT Utrecht, The  
12 Netherlands

13 \*Correspondence: rlewis@unmc.edu

## 14 **Abstract:**

15 The epithelial-to-mesenchymal transition (EMT) is considered a transcriptional process  
16 that induces a switch in cells from a polarized state to a migratory phenotype. Here we show that  
17 KSR1 and ERK promote EMT through the preferential translation of Epithelial-Stromal  
18 Interaction 1 (EPSTI1), which is required to induce the switch from E- to N-cadherin and  
19 coordinate migratory and invasive behavior. EPSTI1 is overexpressed in human colorectal  
20 cancer (CRC) cells. Disruption of KSR1 or EPSTI1 significantly impairs cell migration and  
21 invasion *in vitro*, and reverses EMT, in part, by decreasing the expression of N-cadherin and the  
22 transcriptional repressors of E-cadherin expression, ZEB1 and Slug. In CRC cells lacking KSR1,  
23 ectopic EPSTI1 expression restored the E- to N-cadherin switch, migration, invasion, and  
24 anchorage-independent growth. KSR1-dependent induction of EMT via selective translation of  
25 mRNAs reveals its underappreciated role in remodeling the translational landscape of CRC cells  
26 to promote their migratory and invasive behavior.

## 27 **Introduction:**

28 Molecular scaffolds affect the intensity and duration of signaling pathways by  
29 coordinating a discrete set of effectors at defined subcellular locations to regulate multiple cell  
30 fates (1, 2). Kinase Suppressor of Ras 1 (KSR1) serves as a scaffold for Raf, MEK, and ERK  
31 enabling the efficient transmission of signals within the mitogen activated protein kinase  
32 (MAPK) cascade (3, 4). Although KSR1 is dispensable for normal development, it is necessary  
33 for oncogenic Ras-induced tumorigenesis including colorectal cancer cells (3-7), suggesting that  
34 KSR1 may modulate aberrant signals that redirect the function of effectors typically involved in  
35 normal cellular homeostasis. Activating Ras mutations are present in over 40% of colorectal  
36 cancers (CRC), and associated with advanced disease and decreased overall survival (8, 9).  
37 Activated Ras, a critical driver of both tumor growth and survival, is an alluring therapeutic  
38 target, yet targeting the majority of oncogenic Ras alleles is still a work in progress.  
39 Raf/MEK/ERK signaling can phenocopy Ras signaling essential for CRC growth and survival  
40 (10, 11). Therefore, understanding the effectors that transmit signals emanating from oncogenic  
41 Ras is a valuable step in detecting and targeting the pathways critical to tumor cell function and  
42 their adaptation to therapy.

43 Oncogene-driven signaling pathways promote protein translation that enables expression  
44 of a subset of mRNAs to promote growth, invasion, and metastasis (12-15). Tumor cells have an  
45 increased dependence on cap-dependent translation, unlike their normal complements (14, 16).  
46 Eukaryotic Translation Initiation Factor 4E (eIF4E) is a rate-limiting factor for oncogenic  
47 transformation, with reductions of as little as 40% being sufficient to block tumorigenesis (14).  
48 eIF4E function is regulated by association of 4E-binding proteins (4EBPs). Importantly,  
49 disruption of KSR1 or ERK inhibition leads to dephosphorylation and activation of 4EBP1,  
50 indicating that the function of KSR1 as an ERK scaffold is key to the aberrant regulation of  
51 protein translation (17). This tumor-specific, KSR1-dependent regulation of protein translation of  
52 a subset of genes was predicted to selectively promote survival of CRC cells but not normal  
53 colon epithelia (17, 18).

54 Almost all CRC originates from epithelial cells lining the colon or rectum of the  
55 gastrointestinal tract, but in order to invade to the surrounding tissue, cancer cells lose cell  
56 adhesiveness to acquire motility and become invasive, characterized by the epithelial-to-  
57 mesenchymal transition (EMT), which is central to tumor pathogenesis (19-22). EMT involves a  
58 complex cellular process during which epithelial cells lose polarity, cell-cell contacts and acquire  
59 mesenchymal characteristics. While EMT is crucial for cell plasticity during embryonic  
60 development, trans differentiation and wound healing, when aberrantly activated EMT has  
61 deleterious effects, which facilitate motility and invasion of cancer cells (20-23). EMT has been  
62 shown to be controlled by transcription-dependent mechanisms, especially through repression of  
63 genes that are hallmarks of epithelial phenotype such as E-cadherin. Loss of E-cadherin at the  
64 membrane has been associated with carcinoma progression and EMT (21, 24-26). E-cadherin  
65 function is transcriptionally repressed through the action of EMT transcription factors (TFs),  
66 including Snail-family proteins (*Snail1*, *Slug*), zinc finger E-box binding homeobox 1 and 2  
67 (*ZEB1* and *ZEB2*) and twist-related protein (*Twist*) (23, 27). Transcriptional control of E-  
68 cadherin is unlikely to be sole determinant of EMT, invasion and metastasis. Inappropriate  
69 induction of non-epithelial cadherins, such as N-cadherin by epithelial cells are known to play a  
70 fundamental role during initiation of metastasis (28-34). N-cadherin disassembles adherent

71 junction complexes, disrupting the intercellular cohesion and reorienting the migration of cells,  
72 away from the direction of cell-cell contact (28, 35). Upregulation of N-cadherin expression  
73 promotes motility and invasion (28-30, 36). Thus, central to the process of EMT is the  
74 coordinated loss of E-cadherin expression and the upregulation of N-cadherin gene expression,  
75 termed cadherin switching (34, 37-40).

76 Previous studies have demonstrated transcriptional regulation of EMT through oncogenic  
77 Ras or its downstream effector signaling pathways via the activation of EMT-TFs (41-47).  
78 Oncogenic Ras itself activates EMT-TF *Slug* to induce EMT in skin and colon cancer cells (45,  
79 46). Enhanced activity of ERK2 but not ERK1, has been linked with Ras-dependent regulation of  
80 EMT (41, 42). Several studies have also described an alternative program wherein cells lose their  
81 epithelial phenotype, via post-transcriptional modifications rather than transcriptional repression  
82 involving translational regulation or protein internalization (48-50). Expression profiling of  
83 polysome-bound mRNA to assess translational efficiency identified over thirty genes that were  
84 translationally regulated upon Ras and *TGF $\beta$*  inducing EMT (48, 50). Functional  
85 characterization of the resultant proteins should reveal preferentially translated mRNAs essential  
86 to invasion and metastasis.

87 *EPSTI1* was identified as a stromal fibroblast induced gene upon co-cultures of breast  
88 cancer cells with stromal fibroblasts (51). *EPSTI1* is expressed at low levels in normal breast and  
89 colon tissue but aberrantly expressed in breast tumor tissue (51). *EPSTI1* promotes cell invasion and  
90 malignant growth of primary breast tumor cells (52, 53). We performed polysome profiling in CRC  
91 cells and found that KSR1- and ERK induces of *EPSTI1* protein translation. *EPSTI1* is both  
92 necessary and sufficient for coordinating the up-regulation of N-cadherin with the downregulation of  
93 E-cadherin to stimulate cell motility and invasion in colon cancer cells. These data demonstrate that  
94 ERK-regulated regulation of protein translation is an essential contributor to EMT and reveal a novel  
95 effector of the cadherin switch whose characterization should yield novel insights into the  
96 mechanisms controlling the migratory and invasive behavior of cells.

## 97 **Results:**

### 98 ***Genome wide polysome profiling reveals translational regulation of EPSTI1 by KSR1.***

99 ERK signaling regulates global and selective mRNA translation through RSK1/2-  
100 dependent modification of cap-dependent translation (17, 54). Phosphorylation of cap binding  
101 protein 4E-BP1 releases eIF4E to promote translation and the abundance of eIF4E is a rate-  
102 limiting factor for oncogenic Ras- and Myc-driven transformation (14). We showed previously  
103 that KSR1 maximizes ERK activation in the setting of oncogenic Ras (55), which is required for  
104 increased Myc translation via dephosphorylation of 4E-BP1, supporting CRC cell growth (17).  
105 These observations imply that the ERK scaffold function of KSR1 alters the translational  
106 landscape in CRC cells to support their survival.

107 To determine the effect of KSR1 on translomes in colon cancer cells, we performed  
108 genome-wide polysome profiling (56). We stably expressed short hairpin RNA (shRNA)  
109 constructs targeting KSR1 (KSR1 RNAi) or a non-targeting control in two K-Ras mutant CRC  
110 cell lines, HCT116 and HCT15 (**Fig. 1D, top panels**). We isolated and quantified both total  
111 mRNA and efficiently translated mRNAs (associated with  $\geq 3$  ribosomes) using RNA  
112 sequencing (**Fig. 1A**). We used Anota2seq (57) to calculate translation efficiency (TE) by  
113 comparing the differences in efficiently translated mRNAs to the total transcript of each mRNA  
114 and observed that a significant number of mRNAs ( $[\text{selDeltaTP} \geq \log(1.2)]$  and  $\text{selDeltaPT} \geq$   
115  $\log(1.2)]$  and  $p \text{ value} < 0.05$ ) showed either reduced TE or upregulated TE upon KSR1  
116 disruption (**Fig. 1B-C, Supplementary Table 1**) in both HCT116 and HCT15 cells. Gene Set  
117 Enrichment Analysis (GSEA) of significantly enriched genes in HCT116 and HCT15, identified  
118 11 mRNAs (**Fig. 1B, supplementary Fig. 1A**) in the gene set titled “Hallmark EMT signature”,  
119 “Jechlinger EMT Up”, and Gotzmann EMT up” (58), that had significantly decreased translation  
120 upon KSR1 disruption (**Supplementary Table 2**). Among the genes with decreased translation,  
121 *EPSTI1* was one of the highly significant mRNAs. We sought to determine the functional  
122 relevance of KSR1-dependent induction of EPSTI1 to EMT in colon cancer cells.

123 To confirm that EPSTI1 translation is KSR1-dependent, we observed that, EPSTI1  
124 protein expression was decreased with the knockdown of KSR1 in HCT116 and HCT15 cells  
125 (**Fig. 1D**), while the total mRNA transcript was unchanged upon KSR1 disruption (**Fig. 1E**, left  
126 panel). *EPSTI1* TE was markedly decreased upon KSR1 depletion (**Fig. 1E**, right). RT-qPCR  
127 analysis of sucrose-gradient fractions of monosome mRNA and polysome RNA distribution  
128 confirmed that *EPSTI1* mRNA shifted from actively translating high molecular weight (MW)  
129 polysome fractions to low MW fractions in KSR1 knockdown cells (**Fig. 1F**). In contrast,  
130 *HPRT1* mRNA was insensitive to KSR1 knockdown in HCT116 and HCT15 cells, and qPCR  
131 analysis of *HPRT1* mRNA isolated from sucrose gradient fractions of control and KSR1  
132 knockdown cells showed no significant shift between the low MW and the high MW fractions  
133 (**Supplementary Fig. 1C**). These data show EPSTI1 translation is induced by KSR1.

134

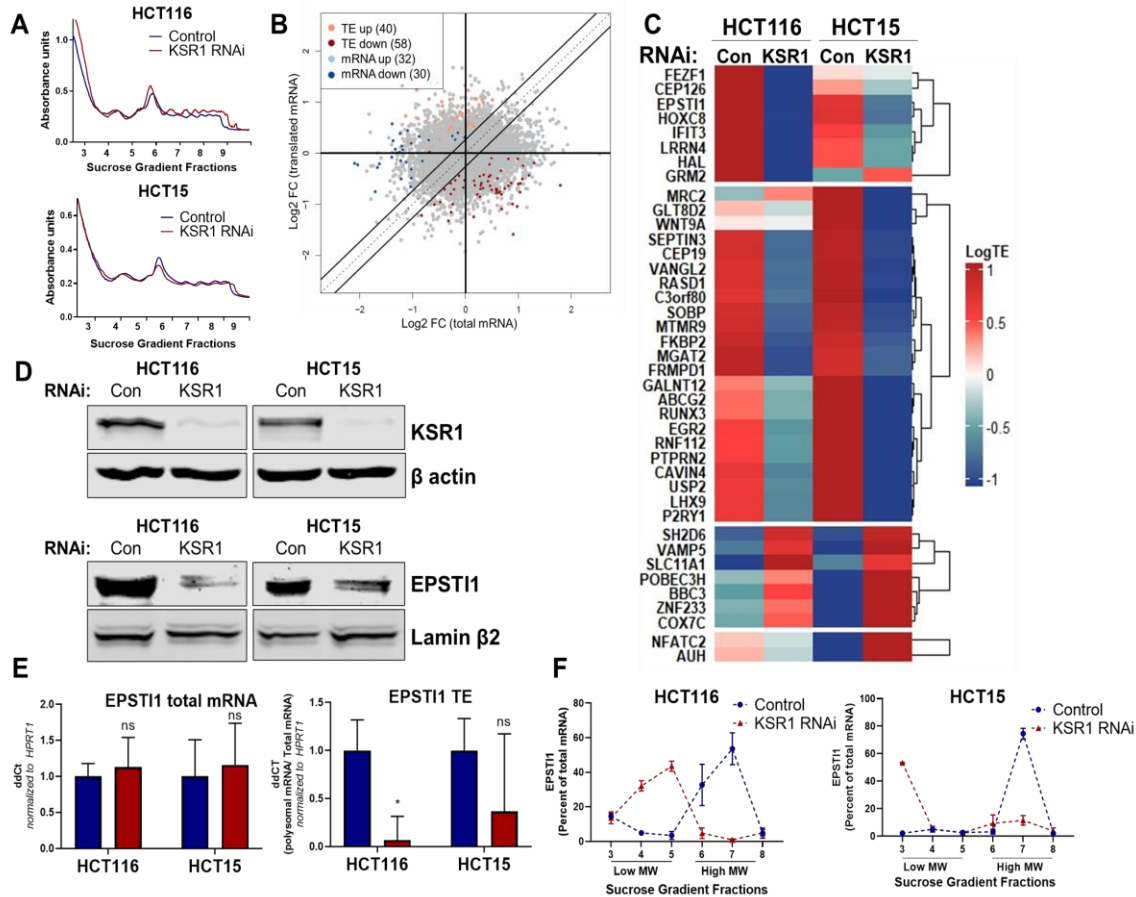

**Figure 1. EPSTI1 translation is regulated by KSR1.** (A) Representative polysome profiles from control and KSR1 knockdown (KSR1 RNAi) HCT116 and HCT15 cells. Sucrose gradient fractions 3-5 denote the low molecular weight complexes and the fractions 6-9 are the high molecular weight polysomes. (B) Scatter plot of polysome-associated mRNA to total mRNA log<sub>2</sub> fold-changes upon KSR1 knockdown in HCT116 and HCT15 with RNA-seq. The statistically significant genes in the absence of KSR1 are classified into four groups with a fold change ( $|\log_2FC|$ ) > 1.2 and p-value < 0.05. The number of mRNAs with a change in TE (orange and red) are indicated (n=3 for each condition). TE, translational efficiency. (C) Heatmap of TE changes for the top 40 RNAs control and KSR1 knockdown (KSR1 RNAi) HCT116 and HCT15 cells (n=3 for each condition). (D) Western blot analysis of KSR1 and EPSTI1 following KSR1 knockdown in HCT116 and HCT15 cells. (E) RT-qPCR analysis of EPSTI1 mRNA from total RNA and polysomal RNA (fractions number 6-8) in control and KSR1 knockdown HCT116 and HCT15 cells, the TE was calculated as the ratio of polysomal mRNA to the total mRNA (n=3; \*, P < 0.05). (F) RT-qPCR analysis of EPSTI1 mRNA levels isolated from sucrose gradient fractions of the control and KSR1 knockdown HCT116 and HCT15 cells. Fractions 3-5 (low MW) and 6-8 (high MW) are plotted for the control and KSR1 knockdown state with values corresponding to the percentage of total mRNA across these fractions n=3. Experiments shown in (A - F) are representative of three independent experiments.



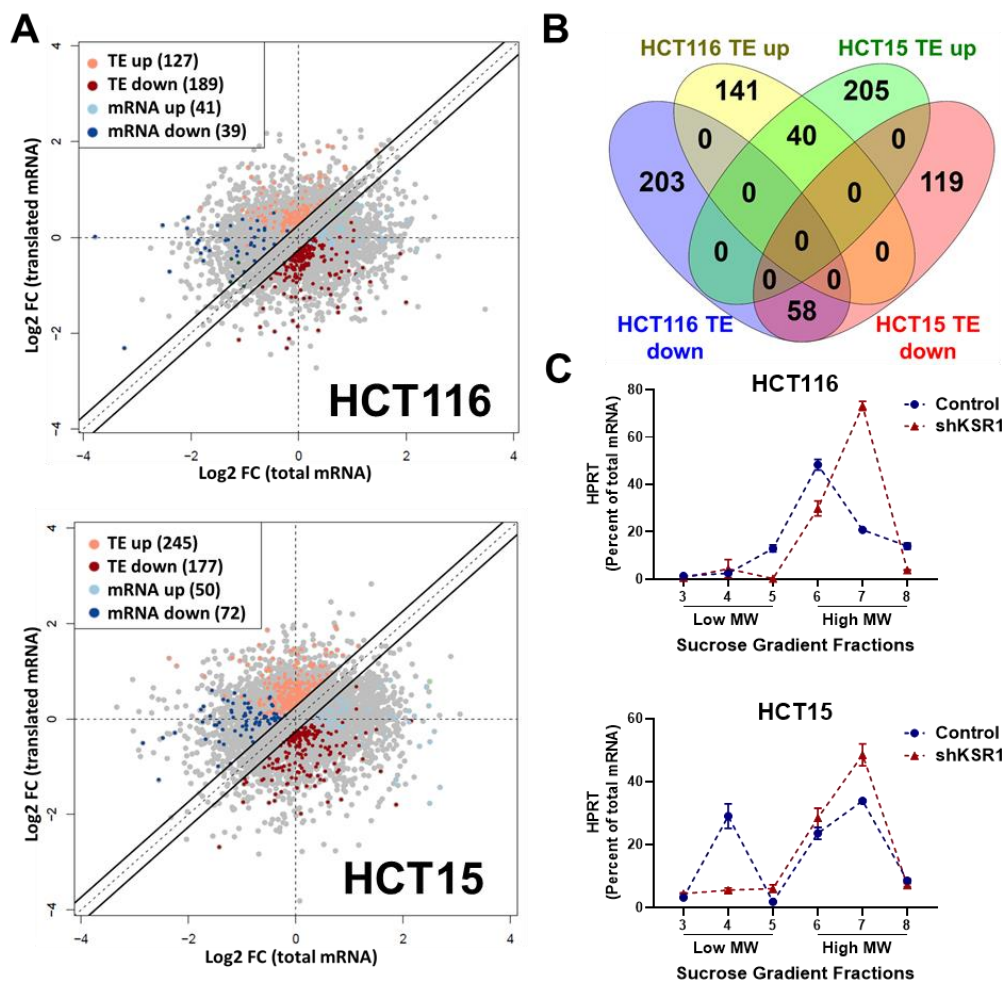

**Figure S1. EPST11 is translationally regulated by KSR1.** (A) Scatter plot of polysome-associated mRNA to total mRNA log<sub>2</sub> fold-changes upon KSR1 knockdown in HCT116 (top) and HCT15 (bottom) with RNA-seq. The statistically significant genes in the absence of KSR1 are classified into four groups with a fold change ( $|\log_2FC| > 1.2$ ) and p-value < 0.05. The number of mRNAs with a change in TE (orange and red) are indicated (n=3 for each cell line). TE, translational efficiency (B) Differential gene expression analysis comparing genes whose TE is changed upon KSR1- knockdown in HCT116 and HCT15 (C) RT-qPCR analysis of *HPRT* mRNA levels isolated from sucrose gradient fractions of the control and KSR1 knockdown HCT116 and HCT15 cells. Fractions 3-5 (low MW) and 6-8 (high MW) are plotted for the control and KSR1 knockdown state with values corresponding to the percentage of total mRNA across these fractions. Experiments shown in (A - C) are representative of three independent experiments.

### 135 ***KSR1/ERK signaling regulates EPST11 expression in colon cancer cells.***

136 To confirm our observations in KSR1 knockdown cells, we tested the effect of  
 137 CRISPR/Cas9-mediated targeting of KSR1 on EPST11 in CRC cell lines. EPST11 protein  
 138 expression was decreased upon KSR1 depletion in HCT116 and HCT15 cells and EPST11  
 139 expression was restored in knockout cells upon expression of a KSR1 transgene (+ KSR1) (Fig.  
 140 2A). Similar to inhibition of KSR1, treatment with ERK inhibitor SCH772984 (59) suppressed  
 141 EPST11 protein expression in both CRC cell line HCT116 and tumorigenic patient derived colon  
 142 organoid engineered with deletion of APC, p53, SMAD4 and K-Ras<sup>G12D</sup> mutation (PDO-11

143 AKPS) (**Fig. 2B**) (60). While the total protein was reduced upon ERK inhibition in HCT116, the  
 144 *EPSTII* transcript levels were not altered significantly by SCH772984 treatment (**Fig. 2C**).

145 We performed polysome profiling in HCT116 cells, either treated with DMSO or ERK  
 146 inhibitor, SCH772984 and we isolated mRNA from low MW monosome (fractions 3-5) and high  
 147 MW polysome (fractions 6-8) fractions (**Fig. 2D**). RT-qPCR demonstrated that *EPSTII* mRNA  
 148 shifted from high MW fractions to the low MW fractions upon ERK inhibition (**Fig. 2E**). The  
 149 distribution of mRNA for *HPRT1* within the same profile was not altered by SCH772984  
 150 treatment (**Fig. 2E**). These data indicate that KSR1-dependent ERK signaling is a critical  
 151 regulator of *EPSTII* protein translation in colon cells and organoids.

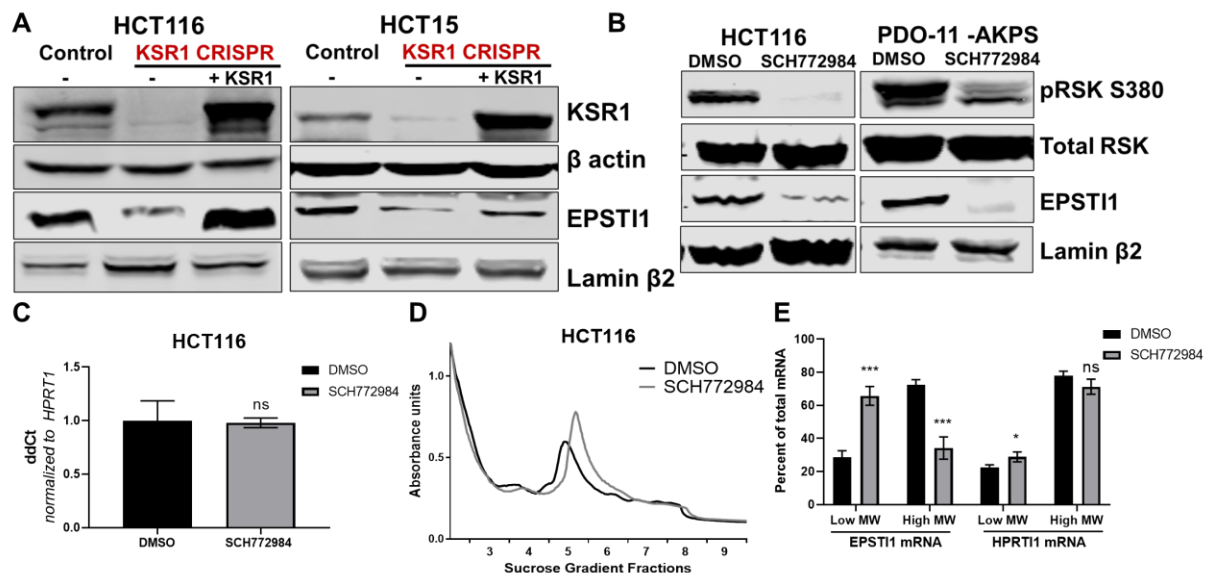

**Figure 2. KSR1 or ERK inhibition suppresses *EPSTII* protein expression in cell lines and organoids.** (A) Cell lysates prepared from control, KSR1 CRISPR-targeted (KSR1 CRISPR) and CRISPR-targeted HCT116 and HCT15 cells expressing KSR1 (KSR1 CRISPR + KSR1) analyzed for *EPSTII* protein expression by Western blotting. (B) Western blot of the indicated proteins in HCT116 (left) and AKPS quadruple mutant organoids (right) treated with DMSO or 1  $\mu$ M of SCH772984 for 48 hours. (C) RT-qPCR analysis of *EPSTII* mRNA from total RNA in HCT116 cells treated with either DMSO or ERK1/2 selective inhibitor, SCH772984 (n=3; ns, non-significant). (D) Representative polysome profiles from HCT116 cells treated DMSO or 1  $\mu$ M of ERK1/2 selective inhibitor, SCH772984. (E) RT-qPCR analysis of *EPSTII* and *HPRT1* mRNA levels from LMW (fractions 3-5) and HMW (fractions 6-8) of the DMSO control and SCH772984-treated HCT116 cells (n=3; \*, P<0.05; \*\*\*, P<0.001). All values displayed as mean  $\pm$  S.D. Experiments shown in (A - E) are representative of three independent experiments.

152 ***EPSTII* is required for anchorage-independent growth in colon cancer cells.**

153 KSR1 disruption inhibits HCT116 cell anchorage-independent growth *in vitro* and tumor  
 154 formation *in vivo* (6). Similarly, disruption of KSR1 by CRISPR/Cas9-mediated targeting  
 155 decreased HCT116 and HCT15 cell viability under anchorage-independent conditions on  
 156 simulated by poly-(HEMA) coating (**Fig. 3A**). KSR1 transgene expression restored cell viability  
 157 in HCT116 and HCT15 cells lacking KSR1 (KSR1 CRISPR + KSR1) (**Fig. 3A**). *EPSTII* protein  
 158 is aberrantly expressed in colon cancer cell lines HCT116 and HCT15, while the expression is  
 159 detected weakly in non-transformed human colon epithelial cells (HCECs) (**Fig. 3B**). *EPSTII*

160 protein expression is also markedly higher in AKPS organoids than normal colon organoids (**Fig.**  
161 **3B**).

162 To determine the regulation of EPSTI1 in human colon tumor maintenance, we  
163 performed siRNA knockdown of EPSTI1 in HCT116 and HCT15 cells. EPSTI1 disruption  
164 suppressed viability on poly-(HEMA) coated by 40% in HCT15 cells, and over 70%, in HCT116  
165 cells (**Fig. 3C**). EPSTI1 knockdown reduced colony formation in soft agar by 63% in HCT116  
166 cells and 71% in SW480 cells (**Fig. 3D**). These observations show that KSR1-dependent  
167 translation of ESPTI1 is required for colon tumor cell transformation.

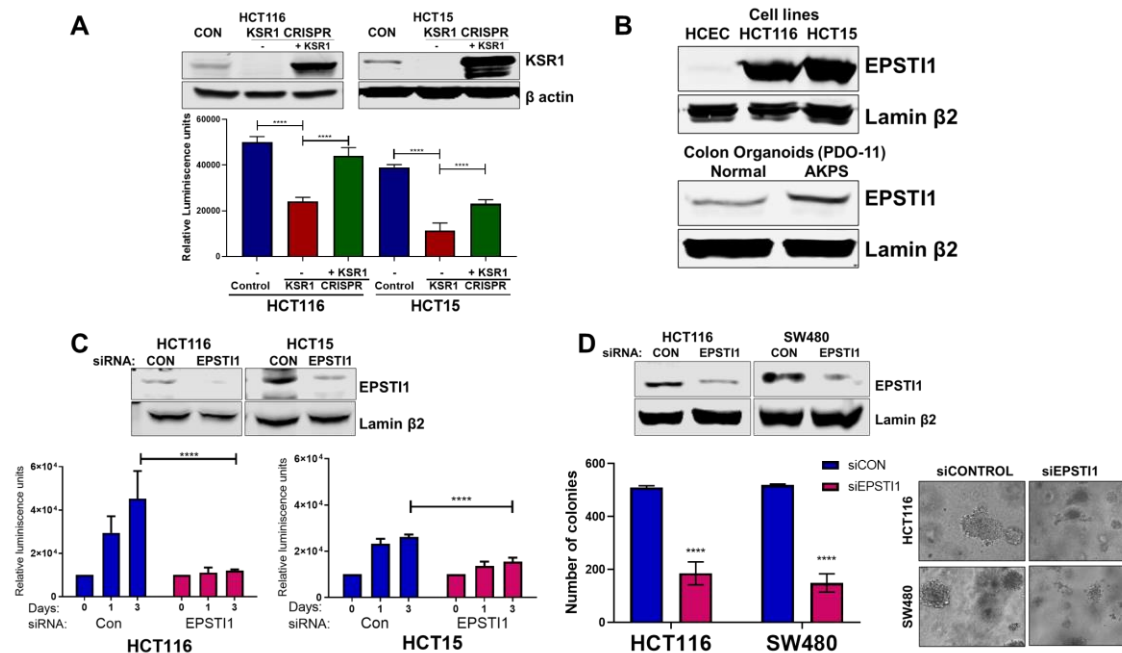

**Figure 3. EPSTI1 is overexpressed in cancer cell lines and organoids and promotes anchorage-independent growth.** (A) Anchorage-independent cell viability was analyzed in HCT116 and HCT15 cells plated on poly-(HEMA)-coated plates was measured using CellTiter-Glo following CRISPR-targeting (KSR1 CRISPR) and re-expressing KSR1 (KSR1 CRISPR + KSR1) in the CRISPR-targeted cells. The data are shown as relative luminescence units mean  $\pm$  SD, n=6. Matched results were analyzed for statistical significance one-way ANOVA followed by t-test. (Upper panels) Western blot showing the expression of KSR1 in control, KSR1 knockout and KSR1-knockout cells expressing a KSR1 transgene (+ KSR1). (B) Western blot analysis of EPSTI1 protein expression was assessed in HCECs, HCT116, HCT15, normal human colon organoids, and transformed AKPS colon organoids. (C) Viability of HCT116 and HCT15 cells measured using CellTiter-Glo following siRNA knockdown of EPSTI1 that were plated on poly-(HEMA)-coated plates to simulate anchorage-independent conditions. Cell viability was measured immediately after plating and 0, 1 and 3 days after plating (n=6). The data are shown as mean luminescence units  $\pm$  SD. Matched results were analyzed for statistical significance by t-test. (Top) Western blot confirming the knockdown of EPSTI1 in HCT116 and SW480 at Day 3. (D) (Left) Quantification of the colonies formed in HCT116 and SW480 cells following RNAi knockdown using non-targeting control (siCON) or EPSTI1 (siEPSTI1) after plating on soft agar. (Right) Representative photomicrographs of colonies for each sample. The data are illustrated as the number of colonies present after two weeks, mean  $\pm$  SD, n=6. Paired results were analyzed for statistical significance using Student's *t* test. (Top) Western blot confirming the knockdown of EPSTI1 in HCT116 and SW480 cells. \*\*\*\*,  $P < 0.0001$



## 168 *KSR1* or *EPSTI1* disruption decreases cell mobility in CRC cells

169 Considering the suggested role of *EPSTI1* in promoting EMT-like phenotypes (51, 52),  
170 we sought to evaluate the biological role of *EPSTI1* in colon cancer cells. Time-lapse images of  
171 control and *EPSTI1* knockdown in HCT116 cell motility in a scratch wound was analyzed by  
172 measuring the relative wound density (61) over 72 hours (**Fig. 4A, bottom**). Motility was also  
173 assessed in control, CRISPR-targeted (*KSR1* CRISPR), and CRISPR-targeted HCT116 cells  
174 expressing *KSR1* (*KSR1* CRISPR + *KSR1*) (**Fig. 4A, top**). Cells lacking either *EPSTI1* or *KSR1*  
175 were approximately 20% less motile compared to control cells. Reintroduction of *KSR1*  
176 expression in CRISPR-targeted HCT116 cells restored motility comparable to the control cells  
177 (**Fig. 4A, top**).

178 *EPSTI1* knockdown HCT116 and SW480 cells were subjected to Transwell invasion  
179 assays. *EPSTI1* RNAi suppresses cell invasion through Matrigel<sup>®</sup> by 72% in HCT116 and by  
180 75% in SW480. (**Fig. 4B, top right and bottom**). Since *KSR1* is required for *EPSTI1*  
181 translation, we determined the functional contribution of *KSR1* in regulating cell invasion. *KSR1*  
182 depletion suppressed invasion by 64% in HCT116 and by 53% SW480 cells (**Fig. 4B, top left**  
183 **and bottom**). Overall, these results suggest the *KSR1*-dependent *EPSTI1* signaling contributes  
184 to cell migration and invasion in CRC cells.

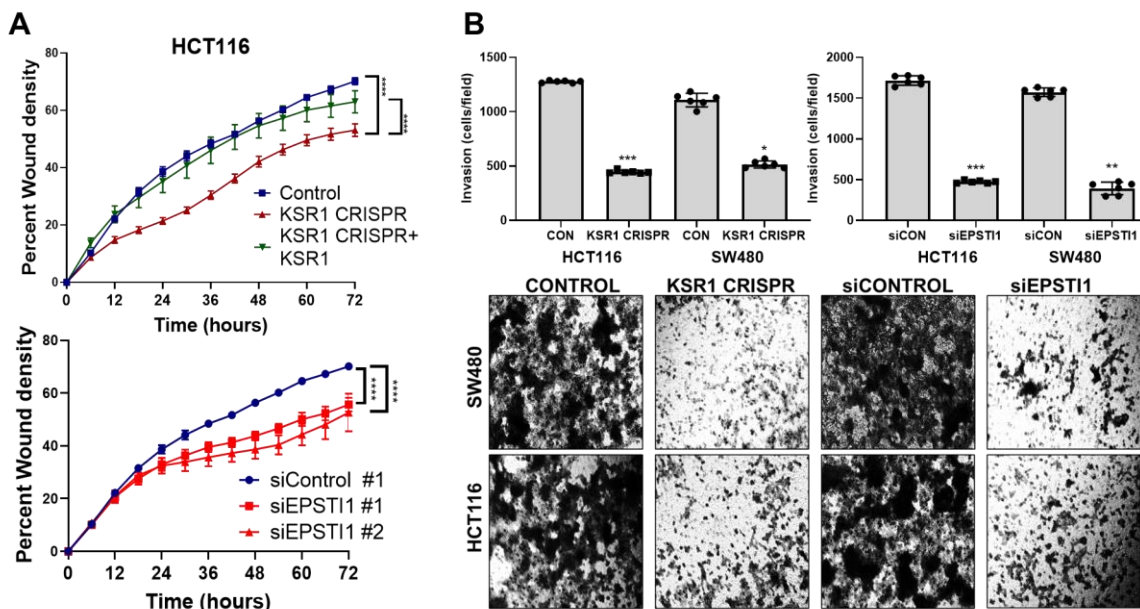

**Figure 4. *KSR1* and *EPSTI1* promote migration and invasion in CRC cells.** (A) Control, CRISPR-targeted (*KSR1* CRISPR) and CRISPR-targeted HCT116 cells expressing *KSR1* (*KSR1* CRISPR + *KSR1*) (upper) and control or *EPSTI1* knockdown HCT116 cells (lower) were evaluated in a 96-well IncuCyte scratch wound assay. The graph represents the time kinetics of percent wound density, calculated by IncuCyte ZOOM software, shown as mean  $\pm$  SD,  $n=12$  \*\*\*\*,  $P < 0.0001$ . Matched results were analyzed for statistical significance using one-way ANOVA with Dunnett's posttest for multiple comparisons. (B) (Upper panels) Control, *KSR1* knockout (*KSR1* CRISPR) and *EPSTI1* knockdown (siEPSTI1) were subjected to Transwell migration assay through Matrigel<sup>®</sup> for 24 hours using 10% FBS as chemoattractant. The number of invaded cells per field were counted. Data are the mean  $\pm$  SD ( $n=6$ ); \*,  $P < 0.1$ ; \*\*,  $P < 0.01$ ; \*\*\*,  $P < 0.001$ . (Lower panels) Representative images of Giemsa-stained cells 24 hours after invasion through Matrigel<sup>®</sup>.

185 ***KSR1* or *EPSTI1* disruption causes cadherin switching in CRC cells.**

186 To understand the underlying mechanism by which *KSR1* and *EPSTI1* promote motility  
 187 and invasion in CRC cells, we evaluated their contribution to the expression of critical  
 188 determinants of EMT that modulate cell adhesion, E- and N-cadherins and EMT-TFs. Compared  
 189 to the non-targeting control, *KSR1* disruption in HCT116, HCT15 and SW480 cells had elevated  
 190 levels of E-cadherin, along with a coincident decrease in EMT-TF *Slug* (**Fig. 5A**). Expression of  
 191 Vimentin, and *Snail1* was not changed in HCT116 cells (**Supplementary Fig. 2A**). Upon  
 192 knockdown of *EPSTI1* with either of two siRNA oligos, we observed a decrease in the  
 193 expression of N-cadherin, *ZEB1* and *Slug*. Coincident with the decrease in EMT-TFs, E-  
 194 cadherin levels were elevated (**Fig. 5B**). While there was no significant change in the *Slug* and  
 195 *ZEB1* mRNA upon *EPSTI1* knockdown (**Supplementary Fig. 2B**), *EPSTI1* disruption decreased  
 196 N-cadherin mRNA expression over 50% in HCT116 and SW480 cells (**Fig. 5C**). These results  
 197 indicate that the switch of E-cadherin to N-cadherin expression promotes the progression of  
 198 migratory and invasive behavior orchestrated by *KSR1*-*EPSTI1* signaling in CRC cells.

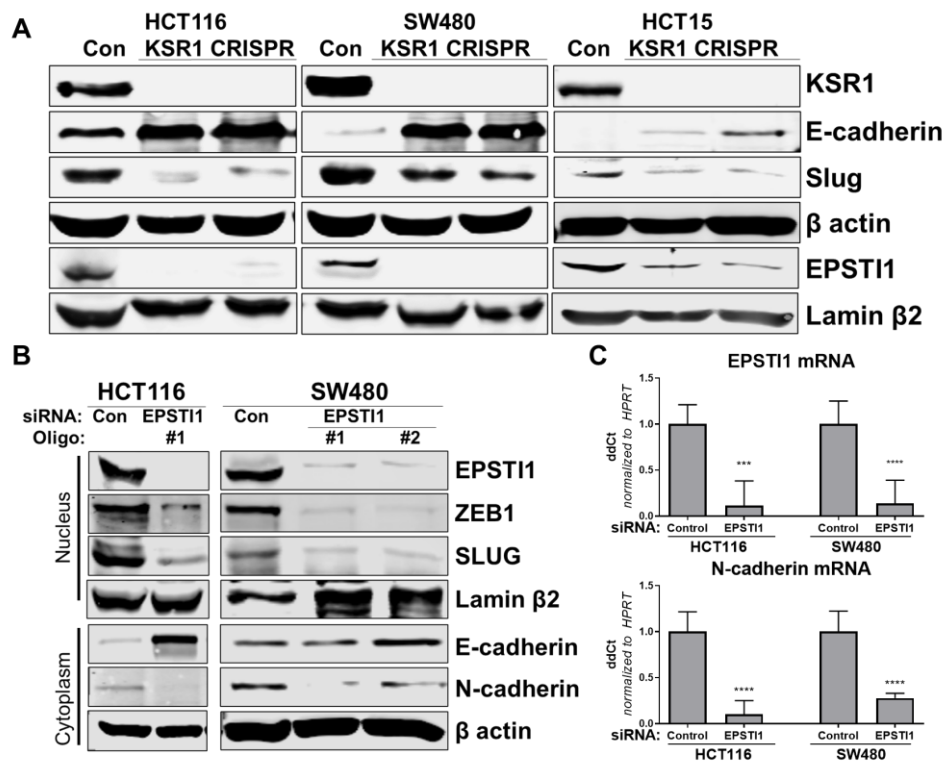

**Figure 5. *KSR1* and *EPSTI1* promote cadherin switching.** (A) Western blot analysis of the cell lysates prepared from control, and two clones of CRISPR-targeted HCT116, SW480, and HCT15 cells (*KSR1* CRISPR) for the E-cadherin, *Slug* and *EPSTI1*. (B) Western blot of *ZEB1*, *Slug*, E-cadherin and N-cadherin in HCT116 and SW480 cells 72 hours following *EPSTI1* knockdown. (C) RT-qPCR analysis of *EPSTI1* mRNA (upper) and *N-cadherin* (lower) following knockdown of *EPSTI1* for 72 hours in HCT116 and SW480 cells. n=6; \*\*\*, P<0.001; \*\*\*\*, P<0.0001. Western blots shown in (A) and (B) and qPCR shown in (C) are representative of at least three independent experiments.

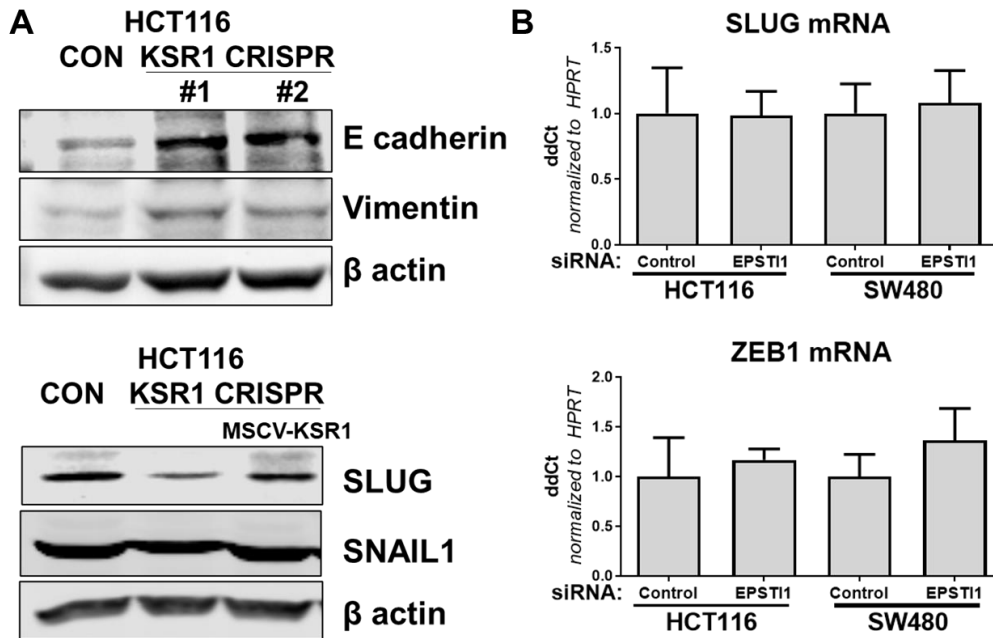

**Figure S2. KSR1 and EPSTI1 promote the cadherin switch.** (A) Western blot analysis of the cell lysates prepared from control, and two clones of CRISPR-targeted HCT116 (KSR1 CRISPR) for (Top-upper) E-cadherin and Vimentin, and (bottom-lower) Cell lysates prepared from control, CRISPR-targeted (KSR1 CRISPR) and CRISPR-targeted HCT116 cells expressing KSR1 (MSCV-KSR1) analyzed for Slug and Snail. (B) RT-qPCR analysis of Slug mRNA (top-upper) and ZEB1 (bottom-lower) following knockdown of EPSTI1 for 72 hours in HCT116 and SW480 cells.

199 ***EPSTI1 is necessary and sufficient for EMT in CRC cells.***

200 To determine the extent to which KSR1- and ERK-dependent EPSTI1 translation is  
201 critical to colon tumor cell growth and invasion, we expressed a MSCV-FLAG-EPSTI1-GFP  
202 construct in KSR1-CRISPR knockout HCT116, SW480, and HCT15 cells. CRISPR/Cas9-  
203 mediated deletion of KSR1 disrupted EPSTI1 expression, downregulated Slug and N-cadherin  
204 expression and elevated E-cadherin expression (Fig. 6A). E-cadherin staining was absent in  
205 control CRC cells but evident at the cell membrane in KSR1 knockout cells (Fig. 6B).  
206 Exogenous expression of EPSTI1 in cells lacking KSR1 restored the cadherin switch, by  
207 decreasing the expression of E-cadherin (Fig. 6A and 6B) and increasing N-cadherin levels  
208 comparable to control cells (Fig. 6A). Suppression of E-cadherin and restoration of N-cadherin  
209 expression by the EPSTI1 transgene reestablished the ability of KSR1 knockout cells to migrate  
210 in monolayer culture (Fig. 6C) and invade through Matrigel®. Forced expression of EPSTI1 in  
211 these cells, increased the number of invading cells by over three-fold (Fig. 6D). These data  
212 reveal that disabling the cadherin switch and inhibition of cell invasion by KSR1 disruption

213 interrupts EPSTI1 translation, highlighting the pivotal role of this pathway for the induction of  
 214 EMT in CRC cells.

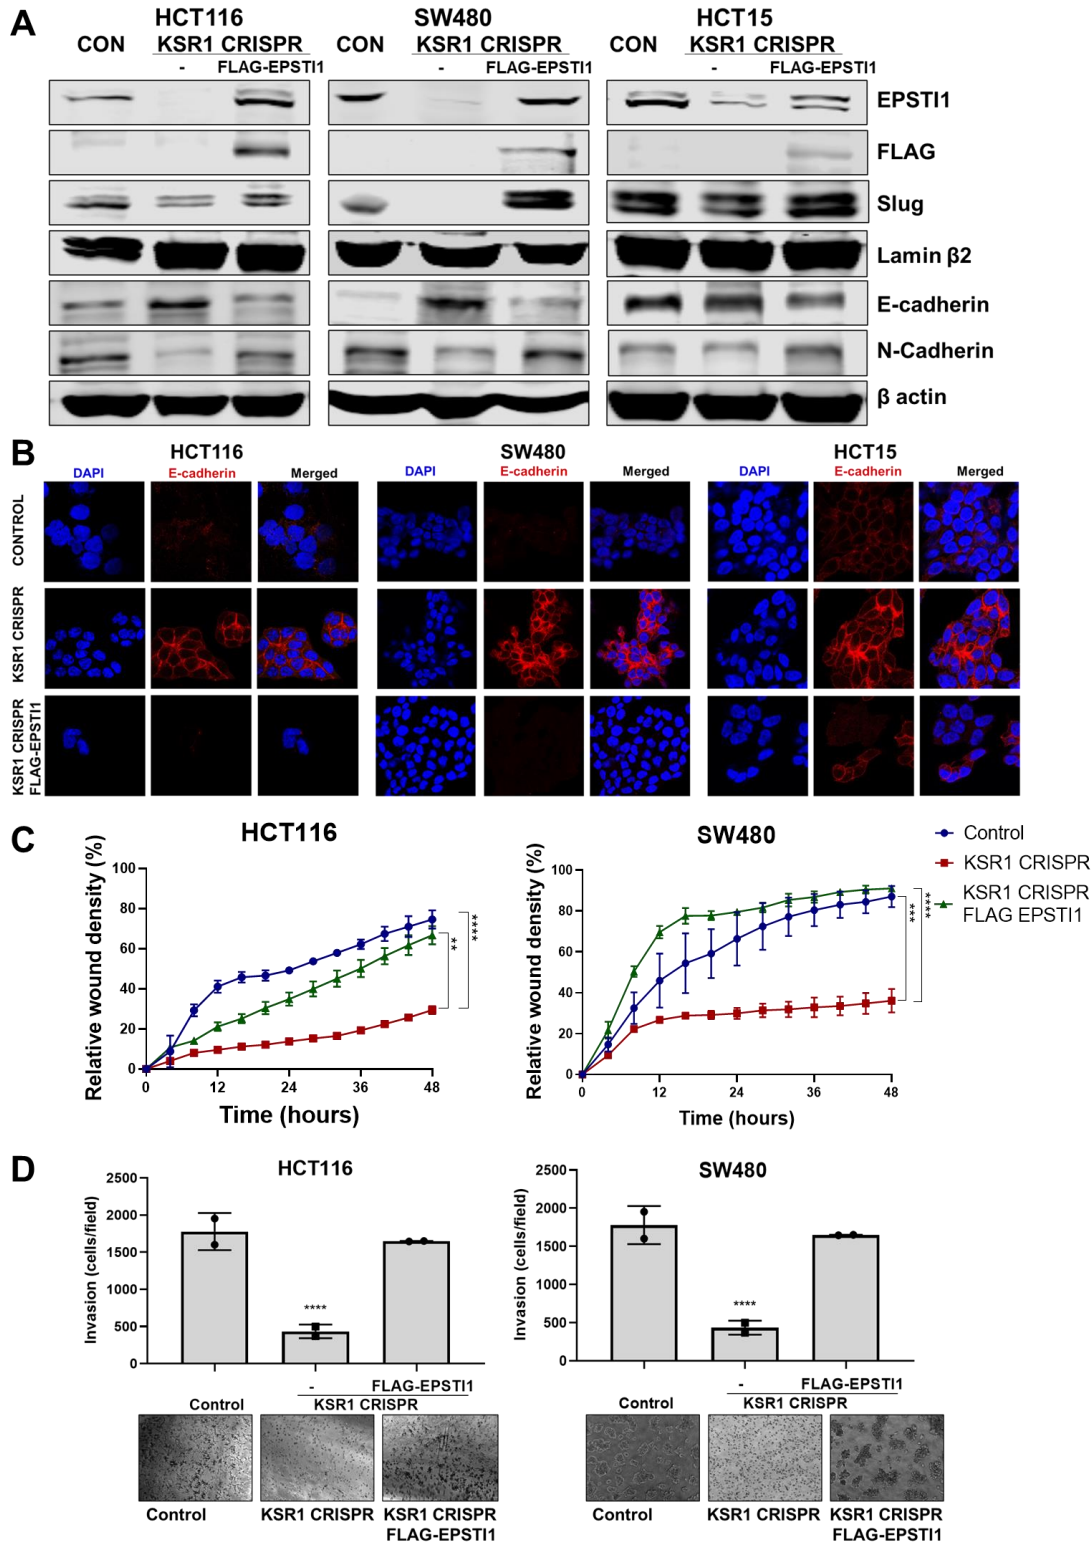



**Figure 6. EPSTI1 rescues cadherin switching and invasive behavior to KSR1 knockout cells. (A)**

EPSTI1 protein expression was assessed by Western blotting in control, KSR1-targeted (KSR1 CRISPR) HCT116, SW480, and HCT15 cells with and without EPSTI1 (FLAG-EPSTI1) expression. Cells were lysed and probed for Slug, E-cadherin, N-cadherin, Lamin  $\beta$ 2, and  $\beta$  actin. **(B)** Immunofluorescence staining for E-cadherin (Red) and DAPI (blue) in control or KSR1-targeted (KSR1 CRISPR) HCT116, SW480, and HCT15 cells with and without EPSTI1 (FLAG-EPSTI1) expression. **(C)** Control, CRISPR-targeted (KSR1-CRISPR) and CRISPR-targeted HCT116 and SW480 cells expressing EPSTI1 (KSR1 CRISPR + FLAG-EPSTI1) were subjected to the 96-well IncuCyte scratch wound assay. The graph represents the time kinetics of percent wound density, calculated by IncuCyte ZOOM software, shown as mean  $\pm$  SD, n=12; \*\*, P < 0.005; \*\*\*, P < 0.001; \*\*\*\*, P < 0.0001. Matched results were analyzed for statistical significance using one-way ANOVA with Dunnett's posttest for multiple comparisons. **(D)** Control, CRISPR-targeted (KSR1 CRISPR) and CRISPR-targeted (E) HCT116 and (F) SW480 cells expressing EPSTI1 (KSR1 CRISPR + FLAG-EPSTI1) were subjected to Transwell migration assay through Matrigel<sup>®</sup>. The number of invaded cells per field were counted, (n=4); \*\*\*\*, P < 0.0001. Representative microscopic images of the respective cells following invasion through Matrigel<sup>®</sup> are shown.

215 ***EPSTI1 re-expression reverses the KSR1-dependent growth inhibition and N-cadherin gene***  
216 ***expression.***

217 Knockdown of EPSTI1 in HCT116 and SW480, decreased N-cadherin mRNA expression  
218 50% (**Fig. 5C**). Upon KSR1 depletion, N-cadherin mRNA decreased 32% in HCT116 and 89%  
219 in SW480 cells (**Fig. 7A**). Ectopic expression of EPSTI1 in these cells restored the N-cadherin  
220 mRNA expression to levels observed in control SW480 cells, while in HCT116 KSR1 KO,  
221 forced EPSTI1 expression increased N-cadherin mRNA levels 3-fold above that seen in control  
222 HCT116 cells (**Fig. 7A**). These data indicate that EPSTI1 mediates KSR1-dependent regulation  
223 of expression of N-cadherin mRNA to promote invasive behavior in colon cancer cells.

224 The E- to N-cadherin switch promotes cancer cell survival following the loss of cell  
225 adhesion to the extracellular matrix (62, 63). KSR1 also promotes CRC cell survival when  
226 detached from a solid substrate (6, 17). To determine the extent to which EPSTI1 expression was  
227 sufficient to restore CRC cell viability in the absence of KSR1, we grew cells under anchorage-  
228 independent conditions either on Poly-(HEMA) (**Fig. 7B**) or on soft agar (**Fig. 7C**) following  
229 forced expression of EPSTI1 in HCT116, HCT15, and SW480 cells lacking KSR1. Anchorage-  
230 independent viability was measured over three days on poly-(HEMA) coated plates. Compared  
231 to control HCT116 and HCT15 cells, viability decreased approximately 75% in cells lacking  
232 KSR1. Ectopic expression of EPSTI1 restored viability to approximately 50% of control levels in  
233 both cell lines (**Fig. 7B**). Similar to our previous findings (6, 55), KSR1 disruption hampered the  
234 ability of Ras transformed cells to form colonies on soft agar, the number of colonies formed in  
235 HCT116 and SW480 cells dramatically decreased by 75% in the absence of KSR1. Forced  
236 expression of EPSTI1 was sufficient to reverse the suppression of colony formation caused by  
237 KSR1 disruption to levels observed in control HCT116 and SW480 cells (**Fig. 7C**). These results



238 show that despite the absence of KSR1 to maintain and support cell growth, ectopic EPSTI1  
 239 expression was able to maintain anchorage-independent viability in CRC cells.

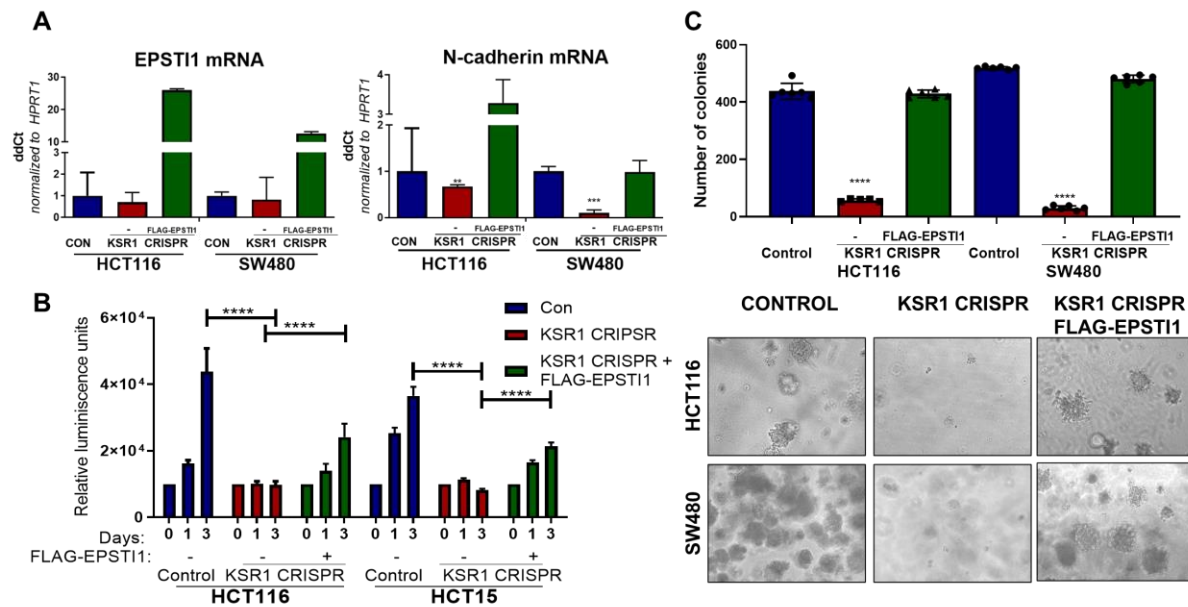

**Figure 7. EPSTI1 expression in KSR1 KO cells induces N-cadherin mRNA expression and restores anchorage-independent growth.** (A) RT-qPCR analysis of *EPSTI1* mRNA (left) and *N-cadherin* (right) in HCT116 and SW480 cells following KSR1 disruption with and without expression of EPSTI1 (FLAG-EPSTI1) in KSR1 KO cells. (n=3), \*\*, P < 0.01, \*\*\*, P < 0.001 (B) KSR1 KO HCT116 and HCT15 cell viability (CellTiter-Glo) on poly-(HEMA)-coated plates at the indicated days with or without EPSTI1 (KSR1 CRISPR + EPSTI1) expression. The data are shown as relative luminescence units mean ± SD, (n=6); \*\*\*\*, P < 0.0001. The data were analyzed for statistical significance by one-way ANOVA followed by *t*-test. (C) Quantification of anchorage-independent colonies formed by KSR1 knockout HCT116 and SW480 cells with and without EPSTI1 expression (KSR1 CRISPR + FLAG-EPSTI1) after plating in soft agar. Representative photomicrographs of colonies from each cell line are shown. The data are illustrated as the number of colonies present after two weeks, (n=6) mean ± SD. \*\*\*\*, P < 0.0001. Data were analyzed for statistical significance one-way ANOVA followed by *t*-test.

## 240 Discussion

241 Persistent oncogenic reprogramming of transcription and translation during EMT grants  
242 migratory and invasive properties to tumor cells (22, 23). Multiple studies have established a  
243 relationship between oncogenic Ras-mediated ERK signaling and EMT, either through Ras or its  
244 downstream effector signaling pathways activating EMT-TFs (41, 43-47, 64). Silencing of Erbin,  
245 a tumor suppressor known to disrupt KSR1-RAF1 interaction, promoted cell migration and  
246 invasion of colon cancer cells, but did not identify the mechanism on how KSR1-dependent  
247 MAPK signaling affected EMT (65). Mediators of EMT activate cap-dependent translation  
248 initiation have been associated with increased aggressiveness and metastases of cancer cells, and  
249 we have shown that KSR1 can affect translation initiation (17, 48, 50, 66).

250 Our observations establish the novel role of the scaffold protein KSR1 promoting the  
251 preferential translation of an EMT-related gene, *EPSTI1*, and outline a mechanism for KSR1-  
252 dependent stimulation of EMT. Using gene-expression analysis of the polysome-bound mRNA,  
253 we discovered KSR1 and ERK increase the translational efficiency of *EPSTI1* mRNA. EPSTI1  
254 mediates KSR1-dependent motility, invasion, and anchorage-independent growth coincident  
255 with its suppression of EMT-TF, Slug, elevating E-cadherin expression. EPSTI1 knockdown also  
256 decreased the expression of N-cadherin mRNA and protein. In the absence of KSR1, ectopic  
257 expression of EPSTI1 was sufficient to suppress E-cadherin expression, stimulate N-cadherin  
258 expression and enhance motility and invasive behavior. These data demonstrate that a KSR1-  
259 and ERK-regulated component is critical to the execution of the transcriptional program that  
260 drives interconversion between epithelial and mesenchymal phenotypes. These studies of post-  
261 transcriptional regulation and mRNA translation reveal the importance of expanding beyond  
262 gene expression analysis for detecting mechanisms underlying epithelial plasticity and  
263 tumorigenicity.

264 The association of EPSTI1 with tumor metastatic potential is supported by observations  
265 that *EPSTI1* is highly upregulated in invasive breast cancer tissues and suggested the role of  
266 EPSTI1 in promoting metastasis, tumorsphere formation, and stemness (51-53). Although the  
267 aberrant expression of EPSTI1 in breast cancer cells is well-established, there is little indication in  
268 the literature on the role of EPSTI1 to induce EMT, cancer invasion, and metastasis. The association  
269 of EPSTI1 induction of invasion in breast cancer cells was attributed to the increased expression of  
270 *Slug* and *Twist* mRNA and increased expression of fibronectin and  $\alpha 2\beta 1$  integrins (53). Another  
271 study suggested the interaction of EPSTI1 with valosin-containing protein (VCP) and the subsequent  
272 activation of NF- $\kappa$ B signaling contributed to the increased tumor invasion and metastasis (52). Future  
273 studies should evaluate the potential of EPSTI1 to directly affect N-cadherin and EMT-TF  
274 expression and assess the role of NF- $\kappa$ B signaling in EPSTI1-dependent CRC cell EMT.

275 Determining how KSR1- and ERK-dependent signaling promotes EPSTI1 translation  
276 should yield novel mechanisms underlying tumor cell metastatic behavior. We show that EPSTI1  
277 mRNA is unchanged upon KSR1 disruption or ERK inhibition (**Figs. 1E and 2C**), suggesting  
278 that KSR1 regulates EPSTI1 through post-transcriptional modifications enhancing its  
279 preferential loading onto the polysomes. Differential mRNA splicing is implicated in EMT-  
280 related processes and splicing regulatory factors have been implicated in the motility and  
281 invasive behavior of tumor cells (67, 68). One possibility is that KSR1 signaling promotes the  
282 splicing of EPSTI1 that promotes its preferential translational contributing to increased  
283 motility and invasion.

284           Upon removal of KSR1 or EPSTI1, the tumor cells switch back from highly migratory  
285 and invasive EMT state to the epithelial state. However, the invasive property is not completely  
286 lost in KSR1/EPSTI1 disruption (**Fig. 4B**), which could be attributed to other mesenchymal  
287 markers retained in the cells, such as vimentin (**Supplementary Fig. 2A**). Investigating other  
288 EMT-related mRNAs that are preferentially translated in response to KSR1-scaffolded ERK  
289 signaling may reveal additional mRNAs that make previously unappreciated contributions to cell  
290 migration, invasion, and EMT. Constitutive KSR1 or EPSTI1 knockout yields developmentally  
291 normal mice (69-71). While KSR1 or EPSTI1 may not be essential to EMT during normal  
292 development, they may play a role in other EMT-dependent events such as wound healing where  
293 cells collectively migrate, differentiate, and re-epithelialize keratinocytes around and/or within  
294 the damaged site. If their role in EMT is exclusive to tumor cells it will reveal a key vulnerability  
295 for therapeutic evaluation. Further characterization of KSR1, EPSTI1 and the additional effectors  
296 repurposed by dysregulated translation in CRC should reveal additional novel mechanisms  
297 critical to CRC tumor survival and progression.

## 298 **Materials and Methods**

### 299 *Cell culture*

300 Colorectal cancer cell lines HCT116, HCT15 and SW480 were acquired from American Type  
301 Culture Collection (ATCC). The cells were cultured in Dulbecco's modified Eagle's medium  
302 (DMEM) containing high glucose with 10% fetal bovine serum (FBS) and grown at 37°C with  
303 ambient O<sub>2</sub> and 5% CO<sub>2</sub>. Non-transformed immortalized human colon epithelial cell line  
304 (HCEC) was a gift from J. Shay (University of Texas [UT] Southwestern) and were grown and  
305 maintained as described previously (6, 72). HCECs were grown in a hypoxia chamber with 2%  
306 O<sub>2</sub> and 5% CO<sub>2</sub> at 37°C in 4 parts DMEM to 1 part medium 199 (Sigma-Aldrich #M4530) with  
307 2% cosmic calf serum (GE Healthcare), 25 ng/mL EGF (R&D, Minneapolis, MN #236-EG), 1  
308 µg/mL hydrocortisone (#H0888), 10 µg/mL insulin (#I550), 2 µg/mL transferrin (#T1428), 5 nM  
309 sodium selenite (Sigma-Aldrich #S5261), and 50 µg/mL gentamicin sulfate (Gibco #15750-060) as  
310 described previously (6). Normal and quadruple mutant AKPS (APC<sup>KO</sup>/KRAS<sup>G12D</sup>/P53  
311 <sup>KO</sup>/SMAD4<sup>KO</sup>) tumor colon organoids obtained from the Living Organoid Biobank housed by  
312 Dr. Hans Clevers and cultured as described previously (60, 73). The normal organoids were  
313 cultured in medium containing advanced DMEM/F12 (Invitrogen #12634) with 50% WNT  
314 conditioned media (produced using stably transfected L cells), 20% R-spondin1, 10% Noggin,  
315 1X B27 (Invitrogen #17504-044), 10 mM nicotinamide (Sigma-Aldrich #N0636), 1.25 mM N-  
316 acetylcysteine (Sigma-Aldrich #A9165-5G), 50 ng/mL EGF (Invitrogen #PMG8043), 5000 nM  
317 TGF-β type I receptor inhibitor A83-01 (Tocris #2939), 10 nM Prostaglandin E2 (Tocris #2296),  
318 3 µM p38 inhibitor SB202190 (Sigma-Aldrich #S7067), and 100 µg/mL Primocin (Invivogen  
319 #ant-pm-1). The quadruple mutant AKPS organoids were grown in media lacking WNT  
320 conditioned media, R-spondin 1, noggin and EGF and containing 10 µM nutlin-3 (Sigma  
321 #675576-98-4).

### 322 *RNA interference*

323 Approximately 500,000 cells were transfected using a final concentration of 20 nM EPSTI1 (J-  
324 015094-09-0020 and J-015094-12-0020) or non-targeting (D-001810-01-20 and D-001810-02-  
325 20) ON-TARGETplus siRNAs from GE Healthcare Dharmacon using 20 µL of Lipofectamine  
326 RNAiMAX (ThermoFisher #13778-150) and 500 µL OptiMEM (ThermoFisher #31985070).  
327 Cells were incubated for 72 hours before further analysis.

### 328 *Generation of KSR1 shRNA knockdown and KSR1 CRISPR/Cas9 knockout cell lines:*

329 A lentiviral pLKO.1-puro constructs targeting KSR1 and non-targeting control were transfected  
330 into HEK-293T cells using trans-lentiviral packaging system (ThermoFisher Scientific). The  
331 virus was collected, and the medium was replaced 48 hours post transfection. HCT116 and  
332 HCT15 cells were infected with virus with 8 µg/mL of Polybrene for several days. The  
333 population of cells with depleted KSR1 was selected with 10 µg/mL puromycin. The KSR1  
334 knockdown was confirmed via Western Blotting.

335 pCAG-SpCas9-GFP-U6-gRNA was a gift from Jizhong Zou (Addgene plasmid #79144), KSR1  
336 sgRNA and non-targeting control sgRNA was cloned into the pCas9 vector. Both the non-  
337 targeting control and sgKSR1 were transfected into HCT116, HCT15 and SW480 cells using PEI  
338 transfection as described previously (74). The GFP-positive cells were sorted 48-hours post  
339 transfection, and colonies were picked by placing sterile glass rings around individual colonies.

340 ***Cell lysis and western blot analysis:***

341 Whole cell lysate was extracted in radioimmunoprecipitation assay (RIPA) buffer containing 50  
342 mM Tris-HCl, 1% NP-40, 0.5% Na deoxycholate, 0.1% Na dodecyl sulfate, 150 mM NaCl, 2  
343 mM EDTA, 2 mM EGTA, and 1X protease and phosphatase inhibitor cocktail (Halt,  
344 ThermoFisher Scientific #78440). Cytoplasmic and nuclear fractionation was performed using  
345 NE-PER™ Nuclear and Cytoplasmic Extraction Reagents (ThermoFisher Scientific #PI78835).  
346 The estimation of protein concentration was done using BCA protein assay (Promega #PI-23222,  
347 PI-23224). Samples were diluted using 1X sample buffer (4X stock, LI-COR #928-40004) with  
348 100 mM dithiothreitol (DTT) (10X stock, 1mM, Sigma #D9779-5G). The protein was separated  
349 using 8-12 % SDS-PAGE and transferred to nitrocellulose membrane. The membrane was  
350 blocked with Odyssey TBS blocking buffer (LICOR-Biosciences #927-50003) for 45 minutes at  
351 room temperature, then incubated with primary antibodies (*Key Resources Table*) at least  
352 overnight at 4°C. IRDye 800CW and 680RD secondary antibodies (LI-COR Biosciences # 926-  
353 32211, # 926-68072) were diluted 1:10,000 in 0.1% TBS-Tween and imaged on the Odyssey  
354 Classic Scanner (LI-COR Biosciences).

355 ***Polysome profiling:***

356 Cells were treated with 100 µg/mL cycloheximide (Sigma #C4859) on ice in PBS for 10  
357 minutes. The cells were lysed with 10 mM HEPES, 100 mM KCL, 5 mM MgCl<sub>2</sub>, 100 µg/mL  
358 cycloheximide, 2 mM DTT, 1% Triton-X100, 2.5 µl RNaseOUT (ThermoFisher Scientific  
359 #10777019). The lysate were cleared by centrifugation for 10 minutes at 13,200rpm at 4°C.  
360 Approximately 200 µL of the total RNA was collected in a new RNase-free microcentrifuge  
361 tube and the remaining supernatant was loaded onto a 15-45% sucrose gradient. The samples  
362 were spun at 37,500 rpm for 2 hours at 4°C in SW55Ti Beckman ultracentrifuge and separated  
363 on a gradient fractionation system to resolve the polysomes. Polysome profiles were identified at  
364 260 nM using an absorbance detector. Gradient fractions were collected dropwise at  
365 0.75mL/min. For RNAseq, the total RNA and RNA pooled from the polysome fraction (fractions  
366 6-9) of three sets of independently isolated cells was isolated using RNazol (Molecular Research  
367 Centre #RN 190) according to the manufacture's protocol. RNA purity was evaluated by the  
368 UNMC DNA Sequencing Core using a BioAnalyzer.

369 ***RNA-sequencing and analysis:***

370 RNA sequencing (RNAseq) was conducted by the UNMC DNA Sequencing Core. For RNA-  
371 seq, RNA was purified from three biological replicates of total and polysome-bound RNA from  
372 HCT116 and HCT15, control and KSR1 knockdown cells as previously described. Stranded  
373 RNA sequencing libraries were prepared as per manufactures' protocol using TrueSeq mRNA  
374 protocol kit (Illumina) and 500 ng of the total RNA was used for each of the samples. Purified  
375 libraries were pooled at a 0.9 pM concentration and sequenced on an Illumina NextSeq550  
376 instrument, using a 75 SR High-output flow cell, to obtain approximately 45 million single-end  
377 reads per sample. NGS short reads from RNA-seq experiments was downloaded from the  
378 HiSeq2500 server in FASTQ format. FastQC  
379 (<http://www.bioinformatics.babraham.ac.uk/projects/fastqc/>) was used to perform quality control  
380 checks on the *fastq* files that contain the raw short reads from sequencing. The reads were then  
381 mapped to the *Homo sapiens* (human) reference genome assembly GRCh38 (hg38) using STAR  
382 v2.7 alignment. The *--quantMode GeneCounts* option in STAR 2.7 (75) was used to obtain the  
383 HTSeq counts per gene. Gencode v32 Gene Transfer Format (GTF) was used for the



384 transcript/gene annotations. The output files were combined into a matrix using R. The gene  
385 counts were further used as input for downstream analysis using Anota2seq. The high-  
386 throughput sequencing data have been deposited in the Gene Expression Omnibus (GEO)  
387 database, [www.ncbi.nlm.nih.gov/geo](http://www.ncbi.nlm.nih.gov/geo) (accession no. GSE164492).

#### 388 ***Translational Efficiency:***

389 The altered levels of total mRNA can impact the changes in the pool of polysome-bound mRNA,  
390 leading to a spurious calculation translational efficiency (TE). Anota2seq (57) allows the  
391 quantification of actual changes in TE. TE was calculated using the R Bioconductor anota2Seq  
392 package for the HTSeq counts by first removing genes that did not contain expression values in  
393 more than 10% of the samples. 16,023 genes remained after this step. TMM normalization was  
394 further performed prior to log<sub>2</sub> counts per million computation (CPM) using the voom function  
395 of the limma package using the anota2seqDataSetFromMatrix function (with parameters  
396 datatype = “RNAseq”, normalize = TRUE, transformation = “TMM-log<sub>2</sub>”). TE was calculated  
397 using the 2 X 2 factorial design model for the two cell lines (HCT116 and HCT15). Genes were  
398 considered significantly regulated at Adjusted p-value < 0.05 when passing filtering criteria  
399 (parameters for anota2seqSelSigGenes function) using Random variance Model [useRVM =  
400 TRUE], [selDeltaPT >log<sub>2</sub>(1.2)], [minSlopeTranslation >-1], [maxSlopeTranslation <2],  
401 [selDeltaTP >log<sub>2</sub>(1.2)], [minSlopeBuffering >-2] and [maxSlopeBuffering <1], [selDeltaP  
402 >log<sub>2</sub>(1)], [selDeltaT >log<sub>2</sub>(1)]. The scatterplots were obtained using the anota2seqPlotFC  
403 function. The heatmaps were generated using the TE values for the two cell lines using the R  
404 Bioconductor ComplexHeatmap package.

#### 405 ***Anchorage-independent growth [poly-(HEMA)] assay:***

406 Poly-(HEMA) stock solution (10 mg/mL) was prepared by dissolving poly-(HEMA) (Sigma  
407 #3932-25G) in 95% ethanol at 37°C until fully dissolved (overnight). Ninety-six-well optical  
408 bottom plates (Thermo Scientific Nunc #165305) were coated in 200 µl of poly-(HEMA)  
409 solution and allowing it to evaporate. Cells were plated in complete growth medium of the poly-  
410 (HEMA) coated plates at a concentration of 10,000 cells/ 100 µL. Cell viability was measured at  
411 the indicated time points by the addition of CellTiter-Glo 2.0 reagent (Promega #G9242) and  
412 luminescence was measured (POLARstar Optima plate reader) according to the manufacturer’s  
413 protocol.

#### 414 ***Anchorage-independent growth (soft agar) assay:***

415 A total of 6000 cells were seeded in 1.6% NuSieve Agarose (Lonza #50081) to assess  
416 anchorage-independent growth according to the protocol of Fisher *et al.* (6). Colonies greater  
417 than 100 µm in diameter from 6 replicates per sample were counted, representative  
418 photomicrographs were taken after 10-14 days of incubation at 37°C and 5% CO<sub>2</sub>.

#### 419 ***RT-qPCR:***

420 Cells were harvested using 1 mL TRIzol (ThermoFisher Scientific #15596026) and RNA  
421 extraction was performed using RNeasy spin columns (Qiagen #74104). RNA was eluted with  
422 nuclease-free water. The RNA was quantified using a NanoDrop 2000 (Thermo Scientific) and  
423 Reverse Transcription (RT) was performed with 2 µg RNA per 40 µl reaction mixture using  
424 iScript Reverse Transcription Supermix (Bio-Rad #170-8891). RT-qPCR was performed using  
425 primers antibodies (*Key Resources Table*), and all targets were amplified using SsoAdvanced

426 Universal SYBR green Supermix (Bio-Rad #1725271) with 40 cycles on a QuantStudio™ 3  
427 (ThermoFisher Scientific). The analysis was performed using  $2^{-\Delta\Delta C_T}$  method (76). For polysome  
428 gradients, the RNA levels were quantified from the cDNA using the standard curve method,  
429 summed across all fractions (3-8) and presented as a percentage of the total fractions.

#### 430 ***Cell migration (Scratch-test) assay:***

431 An *in vitro* scratch test were performed with the IncuCyte Zoom according to the manufacturer's  
432 instructions. Approximately 35,000 cells were seeded onto a 96-well ImageLock plates (Essen  
433 BioScience #4379) and grown to 90-95% confluency. The scratches were created using  
434 WoundMaker (Essen BioScience #4563) in all the wells, after which the cells were washed with  
435 1x PBS, and media without containing serum was replaced. Images of the cells were obtained  
436 every 20 minutes for a total duration of 72 hours using IncuCyte Kinetic Live Cell Imaging  
437 System (Essen BioScience) and analyzed using the IncuCyte Zoom software (Essen BioScience).  
438 Relative wound density was calculated as the percentage of spatial cell density inside the wound  
439 relative to the spatial density outside of the wound area at a given time point. The calculation of  
440 cell migration using this method, avoids false changes in cell density due to proliferation.

#### 441 ***Cell invasion (transwell) assay:***

442 Transwell inserts (24-well Millicell cell culture, #MCEP24H48) were coated with 50  $\mu$ l of  
443 Matrigel® and allowed to solidify for 15-30 minutes. Approximately 20,000 stably generated  
444 knockout cells, or cells after 48 hours of transfection were plated in serum free media in the  
445 upper chamber of transwell insert. Cells were allowed to invade toward 10% serum containing  
446 media in the lower chamber for 24 hours, after which cells and gel in the upper chamber was  
447 gently removed with a sterile cotton applicator and the cells in the lower side of the insert was  
448 fixed with 3.7% formaldehyde for two minutes, permeabilized with 100% methanol for 20  
449 minutes and stained with Giemsa for 15 minutes. The numbers of cells were counted using an  
450 inverted microscope at x20 magnification.

#### 451 ***Immunofluorescence assay:***

452 Cells were plated on glass coverslips to 70-80% confluence for 48 hours in growth media. Cells  
453 were fixed in 1% formaldehyde diluted in PBS for 15 minutes. The cells were rinsed three times  
454 with PBS for 5 minutes and coverslips were blocked for 1 hour with 1X PBS/ 5% goat serum/  
455 0.3% Triton™ X-100 and then incubated with E-cadherin antibody (#4A2) overnight. Cells were  
456 washed three times for 5 min with PBS and incubated in anti-mouse IgG Alexa Fluor® 555  
457 Conjugate (Cell signaling #4409) at a dilution of 1:500 for 1 hour. Coverslips were rinsed three  
458 times for 5 min in PBS and briefly rinsed in distilled water prior to mounting in Prolong® Gold  
459 Antifade Reagent with DAPI (Cell signaling #8961). All Images were acquired using a Zeiss  
460 LSM-780 confocal microscope and processed using ZEISS ZEN 3.2 (blue edition) software.

461 **Key Resources Table:**

| Reagent type            | Designation | Source or reference | Identifiers               | Additional Information |
|-------------------------|-------------|---------------------|---------------------------|------------------------|
| Transfected construct   | siCON#1     | Dharmacon           | D-001810-01-20            | UGGUUUACAUGUCGACUAA    |
| Transfected construct   | siEPSTI1#1  | Dharmacon           | 015094-09-0020            | GAACAGAGCUAAACCGGUU    |
| Transfected construct   | siEPSTI1#2  | Dharmacon           | 015094-12-0020            | UCUGGAGGCUGUUGGAAUA    |
| Transfected construct   | shCon#1     | Fisher, et.al, 2015 | pLKO.1 MC1 puro           | CAACAAGATGAAGAGCACCAA  |
| Transfected construct   | shKSR1#1    | Fisher, et.al, 2015 | pLKO.1 KSR.1 puro         | GTGCCAGAAGAGCATGATTTT  |
| Transfected construct   | shKSR1#2    | Fisher, et.al, 2015 | pLKO.1 KSR.2 puro         | GCTGTTCAAGAAAGAGGTGAT  |
| Transfected construct   | sgCON#1     | This paper          | pCAG-SpCas9-GFP-U6-gNC1   | GTATTACTGATATTGGTGGG   |
| Transfected construct   | sgKSR1 #1   | This paper          | pCAG-SpCas9-GFP-U6-gCR1.1 | GTGCCAGAAGAGCATGATTTT  |
| Transfected construct   | sgKSR1 #2   | This paper          | pCAG-SpCas9-GFP-U6-gCR1.2 | GTGCCAGAAGAGCATGATTTT  |
| Recombinant DNA reagent | FLAG-KSR1   | Fisher, et.al, 2015 | MSCV-KSR1-IRES-GFP        |                        |
| Recombinant DNA reagent | FLAG-EPSTI1 | This paper          | MSCV-FLAG-EPSTI1-IRES-GFP |                        |

|          |                            |                                    |                    |                                                                                                                                  |
|----------|----------------------------|------------------------------------|--------------------|----------------------------------------------------------------------------------------------------------------------------------|
| Other    | EPSTI1                     | IDT                                | Hs.PT.58.50471678  | Forward primer 5'-<br>GTGAATTACTGGAAGTCAAACGG-3'<br>Reverse primer 5' TCCAACAGCCTCCAGATTG 3'<br>Tm 55°C, Exon Location 10-11     |
| Other    | N-cadherin                 | IDT                                | Hs.PT.58.26024443  | Forward primer 5'-GTTTGCCAGTGTGACTCCA-3'<br>Reverse primer 5'-<br>CATAACCACAAACATCAGCACAAG-3'<br>Tm 55°C, Exon Location 13-14    |
| Other    | HPRT1                      | IDT                                | Hs.PT.58v.45621572 | Forward Primer: 5'<br>GTATTCATTATAGTCAAGGGCATATCC 3'<br>Reverse Primer: 5'AGATGGTCAAGGTCGCAAG 3'<br>Tm 60°C, Exon Location 8-9   |
| Other    | ZEB1                       | IDT                                | Hs.PT.58.39178574  | Forward primer 5'-<br>GAGGAGCAGTGAAAGAGAAGG-3'<br>Reverse primer 5'-<br>TACTGTACATCCTGCTTCATCTG-3'<br>Tm 60°C, Exon Location 3-5 |
| Other    | SLUG                       | IDT                                | Hs.PT.58.50471678  | Forward primer 5'-<br>AGGACACATTAGAAGTCAACAG-3'<br>Reverse primer 5'-<br>CAGATGAGCCCTCAGATTTGAC-3'<br>Tm 55°C, Exon Location 2-3 |
| Antibody | anti-KSR1, Rb polyclonal   | Abcam                              | Cat# ab244321      | 1:1000                                                                                                                           |
| Antibody | anti-EPSTI1, Rb polyclonal | Proteintech                        | Cat# 11627-1-AP    | 1:1000                                                                                                                           |
| Antibody | anti-N-cadherin            | <i>Gift from Dr. Keith Johnson</i> | Cat# 13A9          | 1:20                                                                                                                             |
|          |                            | Cell Signaling                     | Cat# 13116         | 1:1000                                                                                                                           |
| Antibody | anti-E-cadherin            | <i>Gift from Dr. Keith Johnson</i> | Cat# 4A2           | 1:10                                                                                                                             |
|          |                            | Cell Signaling                     | Cat# 3195          | 1:1000                                                                                                                           |

|          |                       |                           |            |        |
|----------|-----------------------|---------------------------|------------|--------|
| Antibody | anti-Slug             | Cell Signaling Technology | Cat# 9585  | 1:1000 |
| Antibody | anti-Lamin $\beta$ 2  | Abclonal                  | Cat# A6483 | 1:2000 |
| Antibody | anti- $\beta$ actin   | Santa Cruz                | Cat# 47778 | 1:2000 |
| Antibody | anti-Phospho RSK S380 | Cell Signaling Technology | Cat# 9341  | 1:500  |
| Antibody | anti-Total RSK        | Cell Signaling Technology | Cat# 9355  | 1:1000 |

462



463 ***Acknowledgements***

464 We thank Dr. Xuan Zhang, and Dr. Kai Fu for their assistance with polysome profiling, Lisa E.  
465 Humphrey-Brattain for their assistance with the colon organoid culture, the UNMC Advanced  
466 Microscopy Core, and the UNMC Cell Analysis Facility.

467 We declare no conflicts of interest.

468 ***Funding Information***

469 This work was supported by P20 GM121316 (R.E.L.), and the Fred & Pamela Buffett Cancer  
470 Center Support Grant (P30 CA036727).

471 The funders had no role in the study design, data collection and interpretation, or the decision to  
472 submit the work for publication.

473 **Supplementary Table 1: Translational efficiency of mRNAs (58 decreased and**  
 474 **40 increased) upon KSR1 KD in HCT116 and HCT15 cells.**

| No | Gene Symbol    | translation.apvEff | apvRvmP  |
|----|----------------|--------------------|----------|
| 1  | RN7SKP173      | -2.12              | 0.010526 |
| 2  | AC016074.2     | -1.93              | 0.022299 |
| 3  | FKBP2          | -1.63              | 0.000661 |
| 4  | RP11-89K21.1   | -1.61              | 0.013317 |
| 5  | GLT8D2         | -1.53              | 0.025778 |
| 6  | AC034139.1     | -1.41              | 0.041679 |
| 7  | EPSTI1         | -1.40              | 0.003656 |
| 8  | RUNX3          | -1.39              | 0.024100 |
| 9  | RP11-462G12.1  | -1.38              | 0.008471 |
| 10 | KIAA1377       | -1.26              | 0.025489 |
| 11 | AC074289.1     | -1.26              | 0.009760 |
| 12 | MURC           | -1.25              | 0.006237 |
| 13 | RP11-119F7.5   | -1.24              | 0.014357 |
| 14 | WNT9A          | -1.23              | 0.025868 |
| 15 | RP11-417L19.4  | -1.21              | 0.018054 |
| 16 | GRM2           | -1.19              | 0.020653 |
| 17 | DLL1           | -1.18              | 0.010732 |
| 18 | CTD-2619J13.17 | -1.12              | 0.004376 |
| 19 | RNF112         | -1.03              | 0.011236 |
| 20 | HOXA10-AS      | -1.02              | 0.006914 |
| 21 | HOXC8          | -1.02              | 0.023323 |
| 22 | AC245140.3     | -1.01              | 0.031525 |
| 23 | FRMPD1         | -0.99              | 0.020411 |
| 24 | LRRN4          | -0.95              | 0.011565 |
| 25 | COL13A1        | -0.93              | 0.005897 |
| 26 | CTC-453G23.8   | -0.93              | 0.004409 |
| 27 | PTPRN2         | -0.92              | 0.002917 |
| 28 | BEND3P3        | -0.91              | 0.010644 |
| 29 | RP11-448G15.3  | -0.91              | 0.022294 |
| 30 | MT-TF          | -0.90              | 0.022067 |
| 31 | MRC2           | -0.88              | 0.025039 |
| 32 | P2RY1          | -0.87              | 0.019079 |
| 33 | MGAT2          | -0.87              | 0.022811 |
| 34 | LHX9           | -0.86              | 0.012179 |
| 35 | MTMR9          | -0.82              | 0.030426 |
| 36 | USP2           | -0.81              | 0.011305 |
| 37 | IFIT3          | -0.81              | 0.021296 |
| 38 | RP11-218C14.8  | -0.79              | 0.005042 |
| 39 | ABCG2          | -0.76              | 0.009184 |
| 40 | EGR2           | -0.76              | 0.015341 |
| 41 | RP11-713C19.2  | -0.76              | 0.033777 |
| 42 | ZFP2           | -0.75              | 0.008896 |
| 43 | RASD1          | -0.73              | 0.024515 |
| 44 | RP11-757G1.6   | -0.70              | 0.031518 |
| 45 | KIAA0825       | -0.70              | 0.014460 |
| 46 | SOBP           | -0.69              | 0.035367 |
| 47 | CEP19          | -0.67              | 0.013100 |
| 48 | AQP1           | -0.67              | 0.013263 |
| 49 | TUBBP1         | -0.64              | 0.011810 |
| 50 | SEPTIN3        | -0.62              | 0.038409 |
| 51 | RP5-968P14.2   | -0.58              | 0.041242 |
| 52 | RP5-1139B12.3  | -0.57              | 0.018554 |
| 53 | HAL            | -0.56              | 0.038409 |
| 54 | VANGL2         | -0.55              | 0.026444 |
| 55 | FEZF1          | -0.54              | 0.024427 |
| 56 | AC009802.1     | -0.53              | 0.003870 |
| 57 | GALNT12        | -0.53              | 0.027702 |
| 58 | C3orf80        | -0.52              | 0.024221 |
| 59 | AUH            | 0.51               | 0.049181 |
| 60 | SLC11A1        | 0.51               | 0.033908 |
| 61 | RBM8B          | 0.54               | 0.041679 |
| 62 | MEF2BNB        | 0.54               | 0.042614 |
| 63 | APOBEC3H       | 0.54               | 0.027176 |
| 64 | BBC3           | 0.56               | 0.006004 |
| 65 | HIST1H2AC      | 0.59               | 0.024407 |
| 66 | MRPS6          | 0.60               | 0.022841 |

475

| No | Gene_Symbol   | translation.apvEff | apvRvmP  |
|----|---------------|--------------------|----------|
| 67 | ARHGAP30      | 0.62               | 0.032923 |
| 68 | ACTRT3        | 0.67               | 0.008309 |
| 69 | VAMP5         | 0.69               | 0.023729 |
| 70 | RP11-432J22.2 | 0.69               | 0.023571 |
| 71 | EFCAB6        | 0.73               | 0.005135 |
| 72 | SUMO2P17      | 0.74               | 0.003038 |
| 73 | PRAC2         | 0.76               | 0.025470 |
| 74 | SH2D6         | 0.77               | 0.033212 |
| 75 | AC073072.7    | 0.80               | 0.021478 |
| 76 | AC005932.1    | 0.81               | 0.031525 |
| 77 | RP11-54O7.18  | 0.82               | 0.015558 |
| 78 | CTC-490E21.10 | 0.84               | 0.022299 |
| 79 | AC005281.1    | 0.86               | 0.026496 |
| 80 | RP11-355B11.2 | 0.90               | 0.005146 |
| 81 | NFATC2        | 0.93               | 0.022930 |
| 82 | AC008155.1    | 0.94               | 0.019878 |
| 83 | HSD52         | 1.00               | 0.006602 |
| 84 | RP11-486I11.2 | 1.02               | 0.008414 |
| 85 | RP11-6B6.3    | 1.05               | 0.002162 |
| 86 | ZNF233        | 1.05               | 0.018509 |
| 87 | AP002813.1    | 1.06               | 0.008471 |
| 88 | EIF4A1P7      | 1.07               | 0.003762 |
| 89 | RP11-503N18.1 | 1.09               | 0.020907 |
| 90 | COX7C         | 1.09               | 0.001558 |
| 91 | CTD-2342J14.6 | 1.10               | 0.002788 |
| 92 | TCP10L        | 1.10               | 0.007539 |
| 93 | RP11-353N14.4 | 1.23               | 0.003870 |
| 94 | RP1-140A9.1   | 1.28               | 0.015622 |
| 95 | COX7CP1       | 1.32               | 0.001676 |
| 96 | RP11-663P9.2  | 1.33               | 0.004750 |
| 97 | RP11-85A1.3   | 1.37               | 0.005673 |
| 98 | SLC51B        | 1.46               | 0.023832 |

477 **Supplementary Table 2:** mRNAs translated in KSR1-dependent manner predicted  
478 in mesenchymal-up signature identified by GSEA.

|               | <b>apvEff</b> | <b>apvRvmP</b> |
|---------------|---------------|----------------|
| <b>HCT116</b> |               |                |
| TNFRSF12A     | -0.30         | 0.0282         |
| VIM           | -0.37         | 0.0331         |
| CAPG          | -0.17         | 0.0290         |
| CA2           | -0.43         | 0.0392         |
| TGFB3         | -0.11         | 0.0284         |
| EGR2          | -0.76         | 0.0153         |
| NR4A1         | -0.06         | 0.0418         |
| FBLN5         | -0.38         | 0.0339         |
| <b>HCT15</b>  |               |                |
| ECM1          | -0.02         | 0.0343         |
| CHRNA1        | -0.28         | 0.0397         |
| NR2F1         | -0.39         | 0.0287         |

479

## 480 **References:**

- 481 1. Morrison DK, Davis RJ. Regulation of MAP kinase signaling modules by scaffold  
482 proteins in mammals. *Annu Rev Cell Dev Biol.* 2003;19:91-118.
- 483 2. Pawson T, Scott JD. Signaling through scaffold, anchoring, and adaptor proteins.  
484 *Science.* 1997;278(5346):2075-80.
- 485 3. Kortum RL, Lewis RE. The Molecular Scaffold KSR1 Regulates the Proliferative  
486 and Oncogenic Potential of Cells. *Molecular and Cellular Biology.* 2004;24(10):4407-16.
- 487 4. Nguyen A, Burack WR, Stock JL, Kortum R, Chaika OV, Afkarian M, et al. Kinase  
488 suppressor of Ras (KSR) is a scaffold which facilitates mitogen-activated protein kinase  
489 activation in vivo. *Molecular and Cellular Biology.* 2002;22(9):3035-45.
- 490 5. Fisher KW, Das B, Kortum RL, Chaika OV, Lewis RE. Kinase suppressor of ras 1  
491 (KSR1) regulates PGC1 $\alpha$  and estrogen-related receptor  $\alpha$  to promote oncogenic Ras-  
492 dependent anchorage-independent growth. *Molecular and Cellular Biology.*  
493 2011;31(12):2453-61.
- 494 6. Fisher KW, Das B, Kim HS, Clymer BK, Gehring D, Smith DR, et al. AMPK  
495 Promotes Aberrant PGC1 $\beta$  Expression To Support Human Colon Tumor Cell Survival.  
496 *Molecular and Cellular Biology.* 2015;35(22):3866-79.
- 497 7. Morrison MMM, Daniel AR, Deborah K. Signaling dynamics of the KSR1 scaffold  
498 complex. 2009.
- 499 8. Haigis KM. KRAS Alleles: The Devil Is in the Detail. *Trends Cancer.*  
500 2017;3(10):686-97.
- 501 9. Serebriiskii IG, Connelly C, Frampton G, Newberg J, Cooke M, Miller V, et al.  
502 Comprehensive characterization of RAS mutations in colon and rectal cancers in old  
503 and young patients. *Nat Commun.* 2019;10(1):3722.
- 504 10. Schmitz KJ, Wohlschlaeger J, Alakus H, Bohr J, Stauder MA, Worm K, et al.  
505 Activation of extracellular regulated kinases (ERK1/2) but not AKT predicts poor  
506 prognosis in colorectal carcinoma and is associated with k-ras mutations. *Virchows*  
507 *Arch.* 2007;450(2):151-9.
- 508 11. Brandt R, Sell T, Luthen M, Uhlitz F, Klinger B, Riemer P, et al. Cell type-  
509 dependent differential activation of ERK by oncogenic KRAS in colon cancer and  
510 intestinal epithelium. *Nat Commun.* 2019;10(1):2919.
- 511 12. Chu J, Cargnello M, Topisirovic I, Pelletier J. Translation Initiation Factors:  
512 Reprogramming Protein Synthesis in Cancer. *Trends Cell Biol.* 2016;26(12):918-33.
- 513 13. Avdulov S, Li S, Michalek V, Burrichter D, Peterson M, Perlman DM, et al.  
514 Activation of translation complex eIF4F is essential for the genesis and maintenance of  
515 the malignant phenotype in human mammary epithelial cells. *Cancer Cell.*  
516 2004;5(6):553-63.



- 517 14. Truitt Morgan L, Conn Crystal S, Shi Z, Pang X, Tokuyasu T, Coady Alison M, et  
518 al. Differential Requirements for eIF4E Dose in Normal Development and Cancer. *Cell*.  
519 2015;162(1):59-71.
- 520 15. Pelletier J, Graff J, Ruggero D, Sonenberg N. Targeting the eIF4F translation  
521 initiation complex: a critical nexus for cancer development. *Cancer Research*.  
522 2015;75(2):250-63.
- 523 16. Truitt ML, Ruggero D. New frontiers in translational control of the cancer  
524 genome. *Nat Rev Cancer*. 2016;16(5):288-304.
- 525 17. McCall JL, Gehring D, Clymer BK, Fisher KW, Das B, Kelly DL, et al. KSR1 and  
526 EPHB4 Regulate Myc and PGC1 $\beta$  To Promote Survival of Human Colon Tumors.  
527 *Molecular and Cellular Biology*. 2016;36(17):2246-61.
- 528 18. Neilsen BK, Frodyma DE, McCall JL, Fisher KW, Lewis RE. ERK-mediated  
529 TIMELESS expression suppresses G2/M arrest in colon cancer cells. *PLOS ONE*.  
530 2019;14(1):e0209224.
- 531 19. Ye X, Weinberg RA. Epithelial-Mesenchymal Plasticity: A Central Regulator of  
532 Cancer Progression. *Trends Cell Biol*. 2015;25(11):675-86.
- 533 20. Nieto MA. Epithelial plasticity: a common theme in embryonic and cancer cells.  
534 *Science*. 2013;342(6159):1234850.
- 535 21. Thiery JP, Acloque H, Huang RY, Nieto MA. Epithelial-mesenchymal transitions  
536 in development and disease. *Cell*. 2009;139(5):871-90.
- 537 22. Dongre A, Weinberg RA. New insights into the mechanisms of epithelial-  
538 mesenchymal transition and implications for cancer. *Nat Rev Mol Cell Biol*.  
539 2019;20(2):69-84.
- 540 23. Nieto MA, Huang RY, Jackson RA, Thiery JP. EMT: 2016. *Cell*. 2016;166(1):21-  
541 45.
- 542 24. Thiery JP. Epithelial-mesenchymal transitions in tumour progression. *Nat Rev*  
543 *Cancer*. 2002;2(6):442-54.
- 544 25. Oda T, Kanai Y, Oyama T, Yoshiura K, Shimoyama Y, Birchmeier W, et al. E-  
545 cadherin gene mutations in human gastric carcinoma cell lines. *Proc Natl Acad Sci U S*  
546 *A*. 1994;91(5):1858-62.
- 547 26. Frixen UH, Behrens J, Sachs M, Eberle G, Voss B, Warda A, et al. E-cadherin-  
548 mediated cell-cell adhesion prevents invasiveness of human carcinoma cells. *J Cell*  
549 *Biol*. 1991;113(1):173-85.
- 550 27. Jolly MK, Ware KE, Gilja S, Somarelli JA, Levine H. EMT and MET: necessary or  
551 permissive for metastasis? *Mol Oncol*. 2017;11(7):755-69.
- 552 28. Nieman MT, Prudoff RS, Johnson KR, Wheelock MJ. N-cadherin promotes  
553 motility in human breast cancer cells regardless of their E-cadherin expression. *J Cell*  
554 *Biol*. 1999;147(3):631-44.

- 555 29. Liu CC, Cai DL, Sun F, Wu ZH, Yue B, Zhao SL, et al. FERMT1 mediates  
556 epithelial-mesenchymal transition to promote colon cancer metastasis via modulation of  
557 beta-catenin transcriptional activity. *Oncogene*. 2017;36(13):1779-92.
- 558 30. Suyama K, Shapiro I, Guttman M, Hazan RB. A signaling pathway leading to  
559 metastasis is controlled by N-cadherin and the FGF receptor. *Cancer Cell*.  
560 2002;2(4):301-14.
- 561 31. Rosivatz E, Becker I, Bamba M, Schott C, Diebold J, Mayr D, et al.  
562 Neexpression of N-cadherin in E-cadherin positive colon cancers. *Int J Cancer*.  
563 2004;111(5):711-9.
- 564 32. Okubo K, Uenosono Y, Arigami T, Yanagita S, Matsushita D, Kijima T, et al.  
565 Clinical significance of altering epithelial-mesenchymal transition in metastatic lymph  
566 nodes of gastric cancer. *Gastric Cancer*. 2017;20(5):802-10.
- 567 33. Sadot E, Simcha I, Shtutman M, Ben-Ze'ev A, Geiger B. Inhibition of beta-  
568 catenin-mediated transactivation by cadherin derivatives. *Proc Natl Acad Sci U S A*.  
569 1998;95(26):15339-44.
- 570 34. Loh CY, Chai JY, Tang TF, Wong WF, Sethi G, Shanmugam MK, et al. The E-  
571 Cadherin and N-Cadherin Switch in Epithelial-to-Mesenchymal Transition: Signaling,  
572 Therapeutic Implications, and Challenges. *Cells*. 2019;8(10).
- 573 35. Scarpa E, Szabo A, Bibonne A, Theveneau E, Parsons M, Mayor R. Cadherin  
574 Switch during EMT in Neural Crest Cells Leads to Contact Inhibition of Locomotion via  
575 Repolarization of Forces. *Dev Cell*. 2015;34(4):421-34.
- 576 36. Hulit J, Suyama K, Chung S, Keren R, Agiostratidou G, Shan W, et al. N-  
577 cadherin signaling potentiates mammary tumor metastasis via enhanced extracellular  
578 signal-regulated kinase activation. *Cancer Res*. 2007;67(7):3106-16.
- 579 37. Wheelock MJ, Shintani Y, Maeda M, Fukumoto Y, Johnson KR. Cadherin  
580 switching. *J Cell Sci*. 2008;121(Pt 6):727-35.
- 581 38. Tomita K, van Bokhoven A, van Leenders GJ, Ruijter ET, Jansen CF,  
582 Bussemakers MJ, et al. Cadherin switching in human prostate cancer progression.  
583 *Cancer Res*. 2000;60(13):3650-4.
- 584 39. Maeda M, Johnson KR, Wheelock MJ. Cadherin switching: essential for  
585 behavioral but not morphological changes during an epithelium-to-mesenchyme  
586 transition. *J Cell Sci*. 2005;118(Pt 5):873-87.
- 587 40. Araki K, Shimura T, Suzuki H, Tsutsumi S, Wada W, Yajima T, et al. E/N-  
588 cadherin switch mediates cancer progression via TGF-beta-induced epithelial-to-  
589 mesenchymal transition in extrahepatic cholangiocarcinoma. *Br J Cancer*.  
590 2011;105(12):1885-93.
- 591 41. Shin S, Dimitri CA, Yoon S-O, Dowdle W, Blenis J. ERK2 but not ERK1 induces  
592 epithelial-to-mesenchymal transformation via DEF motif-dependent signaling events.  
593 *Molecular Cell*. 2010;38(1):114-27.

- 594 42. Shin S, Buel GR, Nagiec MJ, Han MJ, Roux PP, Blenis J, et al. ERK2 regulates  
595 epithelial-to-mesenchymal plasticity through DOCK10-dependent Rac1/FoxO1  
596 activation. *Proc Natl Acad Sci U S A*. 2019;116(8):2967-76.
- 597 43. Andreolas C, Kalogeropoulou M, Voulgari A, Pintzas A. Fra-1 regulates vimentin  
598 during Ha-RAS-induced epithelial mesenchymal transition in human colon carcinoma  
599 cells. *Int J Cancer*. 2008;122(8):1745-56.
- 600 44. Liu Y, Sanchez-Tillo E, Lu X, Huang L, Clem B, Telang S, et al. The ZEB1  
601 transcription factor acts in a negative feedback loop with miR200 downstream of Ras  
602 and Rb1 to regulate Bmi1 expression. *J Biol Chem*. 2014;289(7):4116-25.
- 603 45. Wong CE, Yu JS, Quigley DA, To MD, Jen KY, Huang PY, et al. Inflammation  
604 and Hras signaling control epithelial-mesenchymal transition during skin tumor  
605 progression. *Genes Dev*. 2013;27(6):670-82.
- 606 46. Wang Y, Ngo VN, Marani M, Yang Y, Wright G, Staudt LM, et al. Critical role for  
607 transcriptional repressor Snail2 in transformation by oncogenic RAS in colorectal  
608 carcinoma cells. *Oncogene*. 2010;29(33):4658-70.
- 609 47. Lemieux E, Bergeron S, Durand V, Asselin C, Saucier C, Rivard N. Constitutively  
610 active MEK1 is sufficient to induce epithelial-to-mesenchymal transition in intestinal  
611 epithelial cells and to promote tumor invasion and metastasis. *Int J Cancer*.  
612 2009;125(7):1575-86.
- 613 48. Jechlinger M, Grunert S, Tamir IH, Janda E, Ludemann S, Waerner T, et al.  
614 Expression profiling of epithelial plasticity in tumor progression. *Oncogene*.  
615 2003;22(46):7155-69.
- 616 49. Aiello NM, Maddipati R, Norgard RJ, Balli D, Li J, Yuan S, et al. EMT Subtype  
617 Influences Epithelial Plasticity and Mode of Cell Migration. *Dev Cell*. 2018;45(6):681-95  
618 e4.
- 619 50. Waerner T, Alacakaptan M, Tamir I, Oberauer R, Gal A, Brabletz T, et al. ILEI: a  
620 cytokine essential for EMT, tumor formation, and late events in metastasis in epithelial  
621 cells. *Cancer Cell*. 2006;10(3):227-39.
- 622 51. Nielsen HL, Ronnov-Jessen L, Villadsen R, Petersen OW. Identification of  
623 EPSTI1, a novel gene induced by epithelial-stromal interaction in human breast cancer.  
624 *Genomics*. 2002;79(5):703-10.
- 625 52. Li T, Lu H, Shen C, Lahiri SK, Wason MS, Mukherjee D, et al. Identification of  
626 epithelial stromal interaction 1 as a novel effector downstream of Krüppel-like factor 8 in  
627 breast cancer invasion and metastasis. *Oncogene*. 2014;33(39):4746-55.
- 628 53. de Neergaard M, Kim J, Villadsen R, Fridriksdottir AJ, Rank F, Timmermans-  
629 Wielenga V, et al. Epithelial-Stromal Interaction 1 (EPSTI1) Substitutes for Peritumoral  
630 Fibroblasts in the Tumor Microenvironment. *Am J Pathol*. 1762010. p. 1229-40.
- 631 54. Roux PP, Shahbazian D, Vu H, Holz MK, Cohen MS, Taunton J, et al. RAS/ERK  
632 signaling promotes site-specific ribosomal protein S6 phosphorylation via RSK and  
633 stimulates cap-dependent translation. *J Biol Chem*. 2007;282(19):14056-64.

- 634 55. Kortum RL, Johnson HJ, Costanzo DL, Volle DJ, Razidlo GL, Fusello AM, et al.  
635 The molecular scaffold kinase suppressor of Ras 1 is a modifier of RasV12-induced and  
636 replicative senescence. *Molecular and Cellular Biology*. 2006;26(6):2202-14.
- 637 56. King HA, Gerber AP. Translatome profiling: methods for genome-scale analysis  
638 of mRNA translation. *Brief Funct Genomics*. 2016;15(1):22-31.
- 639 57. Oertlin C, Lorent J, Murie C, Furic L, Topisirovic I, Larsson O. Generally  
640 applicable transcriptome-wide analysis of translation using anota2seq. *Nucleic Acids  
641 Res*. 2019;47(12):e70.
- 642 58. Subramanian A, Tamayo P, Mootha VK, Mukherjee S, Ebert BL, Gillette MA, et  
643 al. Gene set enrichment analysis: A knowledge-based approach for interpreting  
644 genome-wide expression profiles. *Proceedings of the National Academy of Sciences*.  
645 2005;102(43):15545-50.
- 646 59. Morris EJ, Jha S, Restaino CR, Dayananth P, Zhu H, Cooper A, et al. Discovery  
647 of a novel ERK inhibitor with activity in models of acquired resistance to BRAF and MEK  
648 inhibitors. *Cancer Discovery*. 2013;3(7):742-50.
- 649 60. Drost J, van Jaarsveld RH, Ponsioen B, Zimmerlin C, van Boxtel R, Buijs A, et al.  
650 Sequential cancer mutations in cultured human intestinal stem cells. *Nature*.  
651 2015;521(7550):43-7.
- 652 61. Johnston ST, Shah ET, Chopin LK, Sean McElwain DL, Simpson MJ. Estimating  
653 cell diffusivity and cell proliferation rate by interpreting IncuCyte ZOOM assay data  
654 using the Fisher-Kolmogorov model. *BMC Syst Biol*. 2015;9:38.
- 655 62. Derksen PW, Liu X, Saridin F, van der Gulden H, Zevenhoven J, Evers B, et al.  
656 Somatic inactivation of E-cadherin and p53 in mice leads to metastatic lobular  
657 mammary carcinoma through induction of anoikis resistance and angiogenesis. *Cancer  
658 Cell*. 2006;10(5):437-49.
- 659 63. Onder TT, Gupta PB, Mani SA, Yang J, Lander ES, Weinberg RA. Loss of E-  
660 cadherin promotes metastasis via multiple downstream transcriptional pathways.  
661 *Cancer Res*. 2008;68(10):3645-54.
- 662 64. Diesch J, Sanij E, Gilan O, Love C, Tran H, Fleming NI, et al. Widespread FRA1-  
663 dependent control of mesenchymal transdifferentiation programs in colorectal cancer  
664 cells. *PLoS One*. 2014;9(3):e88950.
- 665 65. Stevens PD, Wen Y-A, Xiong X, Zaytseva YY, Li AT, Wang C, et al. Erbin  
666 Suppresses KSR1-Mediated RAS/RAF Signaling and Tumorigenesis in Colorectal  
667 Cancer. *Cancer Research*. 2018;78(17):4839-52.
- 668 66. Prakash V, Carson BB, Feenstra JM, Dass RA, Sekyrova P, Hoshino A, et al.  
669 Ribosome biogenesis during cell cycle arrest fuels EMT in development and disease.  
670 *Nat Commun*. 2019;10(1):2110.
- 671 67. Park S, Brugiolo M, Akerman M, Das S, Urbanski L, Geier A, et al. Differential  
672 Functions of Splicing Factors in Mammary Transformation and Breast Cancer  
673 Metastasis. *Cell Rep*. 2019;29(9):2672-88 e7.

- 674 68. Pradella D, Naro C, Sette C, Ghigna C. EMT and stemness: flexible processes  
675 tuned by alternative splicing in development and cancer progression. *Mol Cancer*.  
676 2017;16(1):8.
- 677 69. Lozano J, Xing R, Cai Z, Jensen HL, Tremplus C, Mark W, et al. Deficiency of  
678 kinase suppressor of Ras1 prevents oncogenic ras signaling in mice. *Cancer Res*.  
679 2003;63(14):4232-8.
- 680 70. Nguyen A, Burack WR, Stock JL, Kortum R, Chaika OV, Afkarian M, et al. Kinase  
681 suppressor of Ras (KSR) is a scaffold which facilitates mitogen-activated protein kinase  
682 activation in vivo. *Mol Cell Biol*. 2002;22(9):3035-45.
- 683 71. Kim YH, Lee JR, Hahn MJ. Regulation of inflammatory gene expression in  
684 macrophages by epithelial-stromal interaction 1 (Epsti1). *Biochem Biophys Res*  
685 *Commun*. 2018;496(2):778-83.
- 686 72. Roig AI, Eskiocak U, Hight SK, Kim SB, Delgado O, Souza RF, et al.  
687 Immortalized Epithelial Cells Derived From Human Colon Biopsies Express Stem Cell  
688 Markers and Differentiate In Vitro. *Gastroenterology*. 2010;138(3):1012-21.e5.
- 689 73. van de Wetering M, Francies HE, Francis JM, Bounova G, Iorio F, Pronk A, et al.  
690 Prospective derivation of a living organoid biobank of colorectal cancer patients. *Cell*.  
691 2015;161(4):933-45.
- 692 74. Longo PA, Kavran JM, Kim MS, Leahy DJ. Transient mammalian cell transfection  
693 with polyethylenimine (PEI). *Methods Enzymol*. 2013;529:227-40.
- 694 75. Dobin A, Davis CA, Schlesinger F, Drenkow J, Zaleski C, Jha S, et al. STAR:  
695 ultrafast universal RNA-seq aligner. *Bioinformatics*. 2013;29(1):15-21.
- 696 76. Schmittgen TD, Livak KJ. Analyzing real-time PCR data by the comparative C(T)  
697 method. *Nat Protoc*. 2008;3(6):1101-8.
- 698



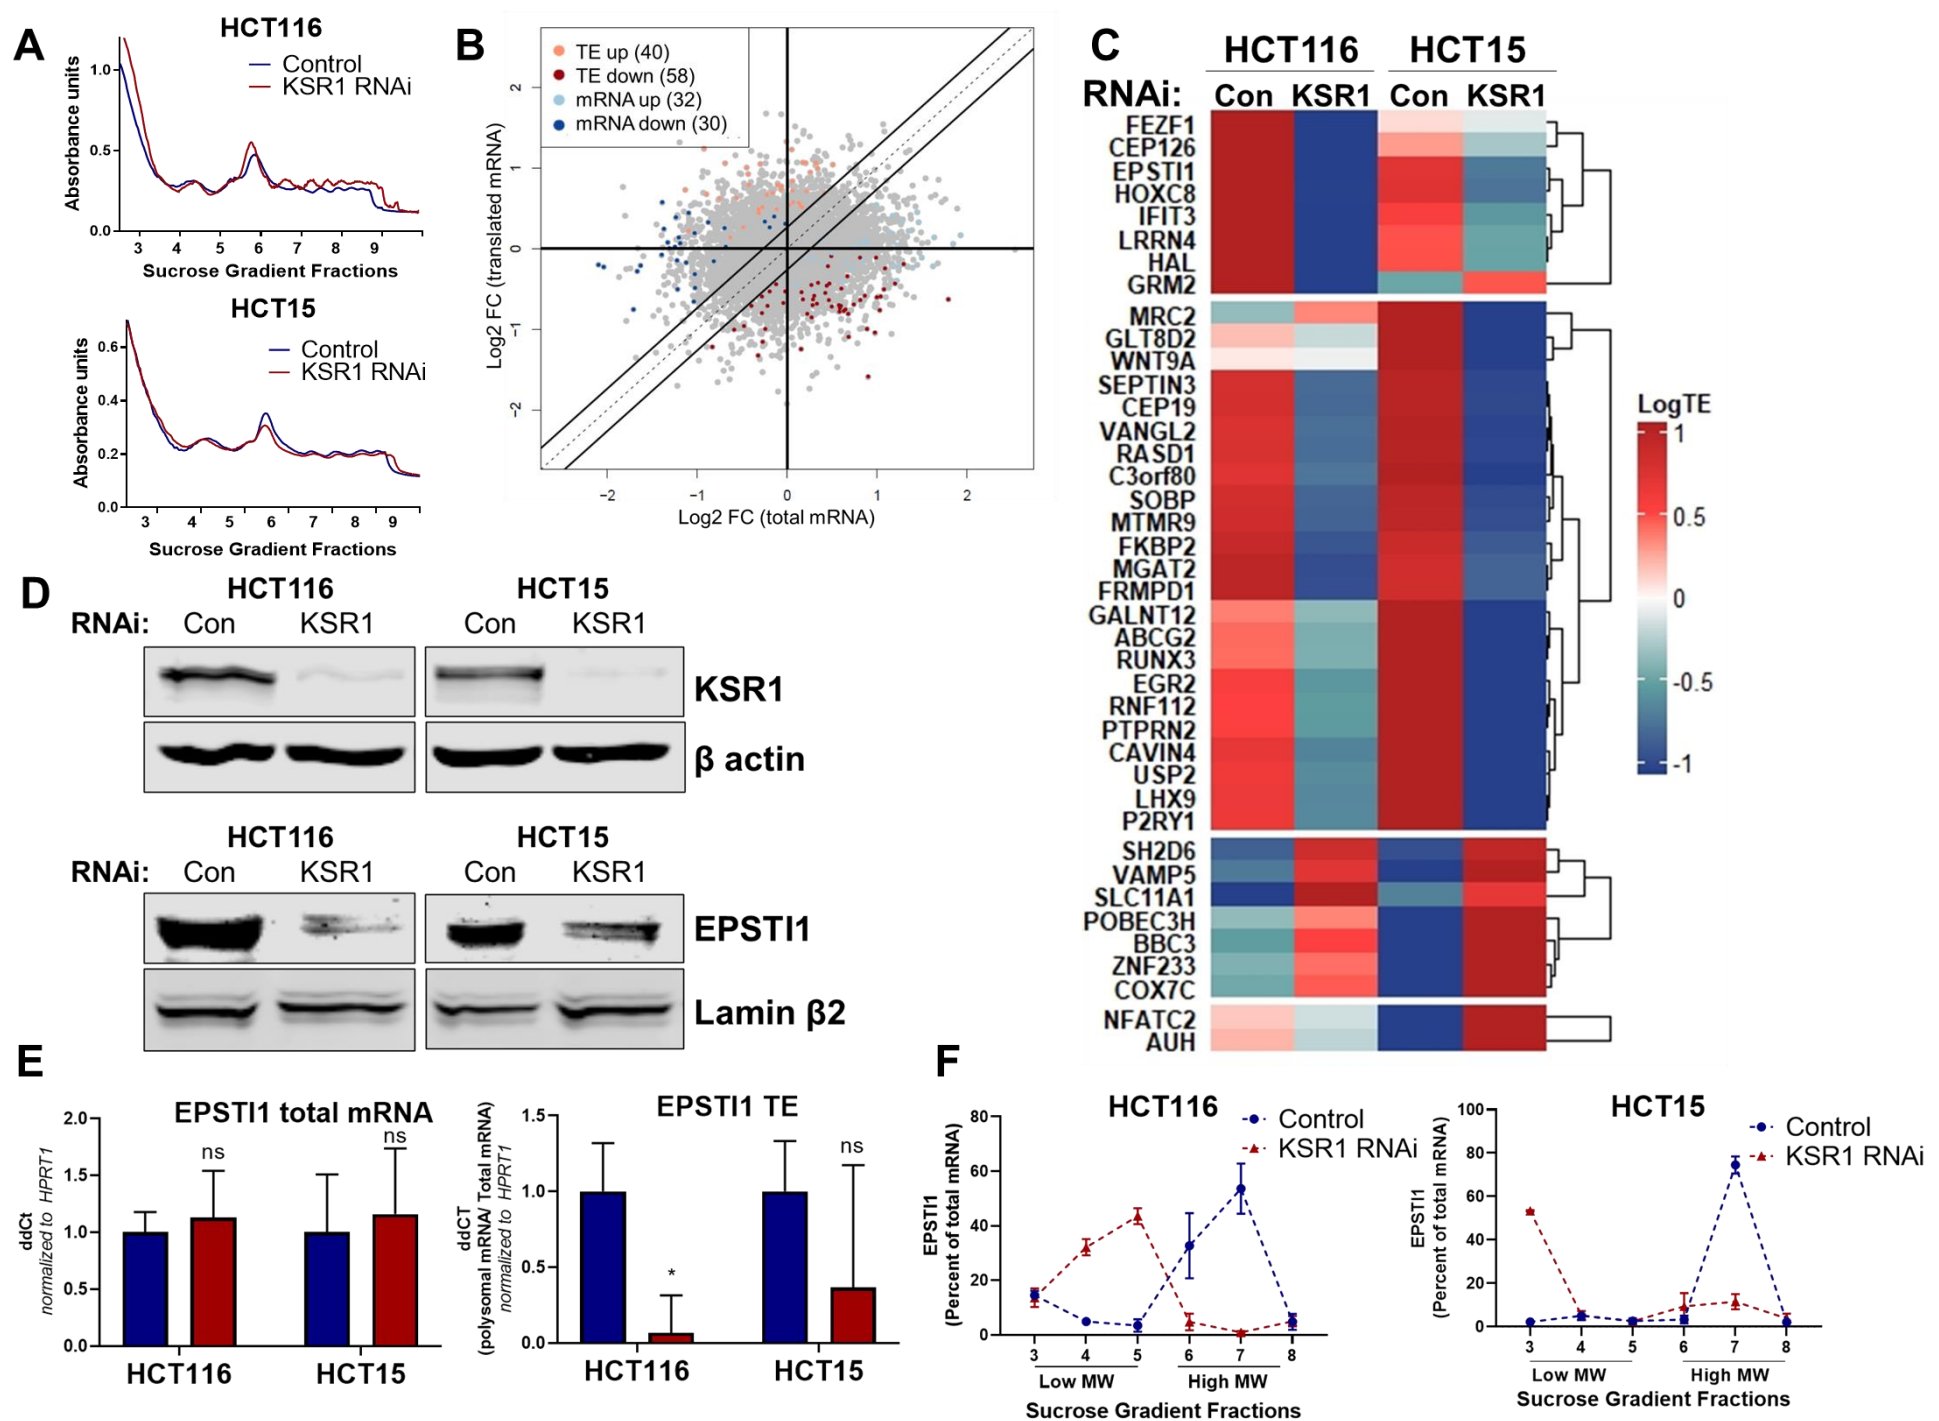

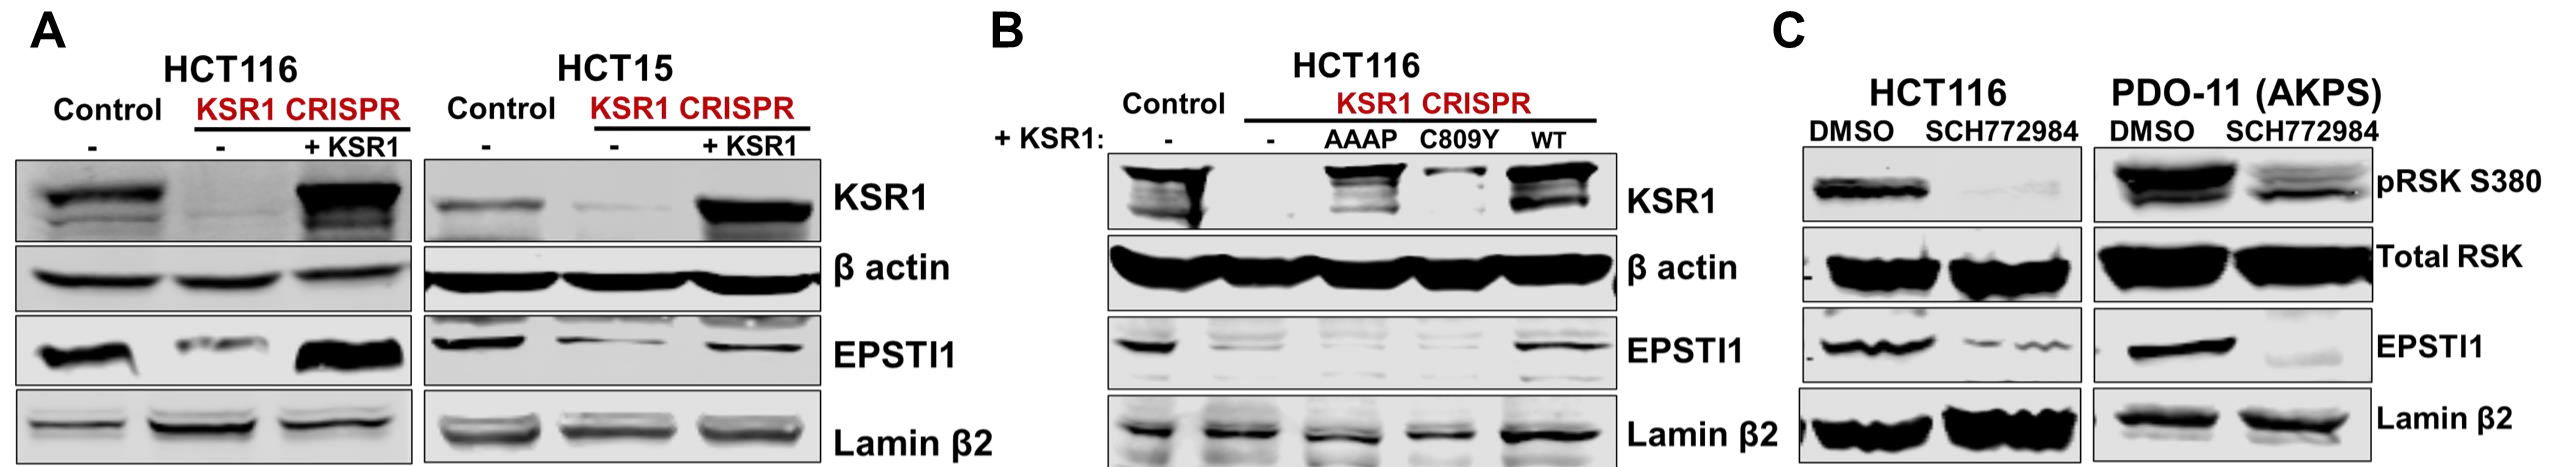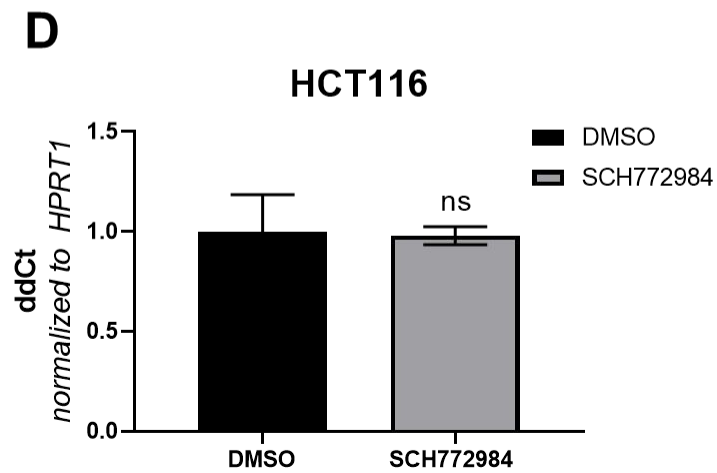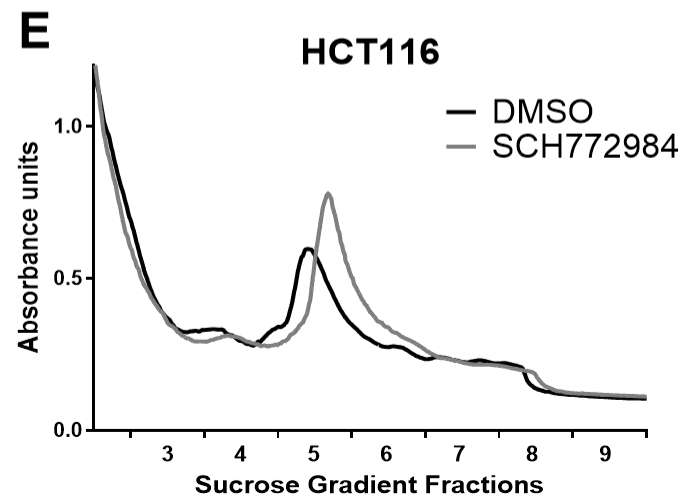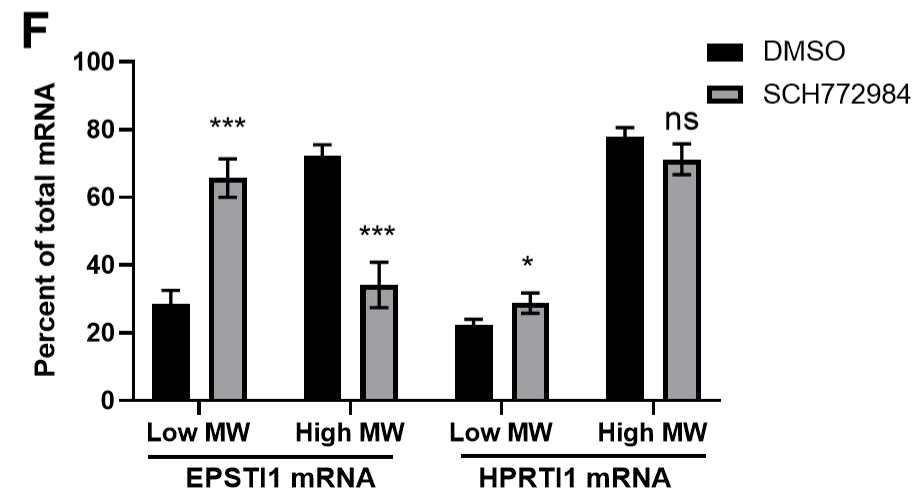

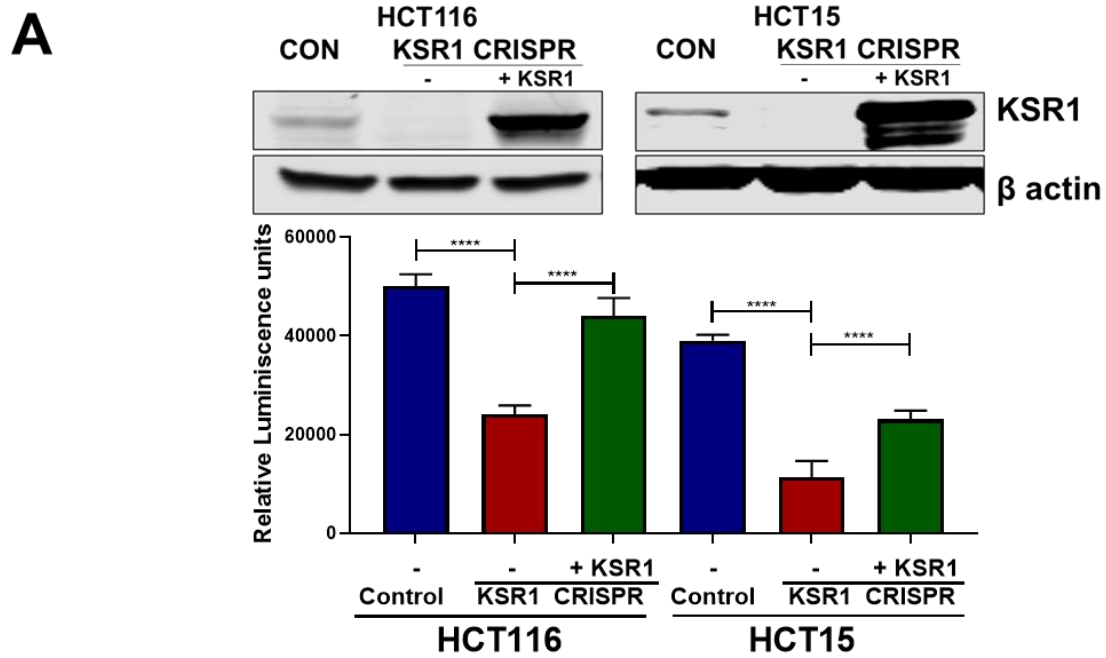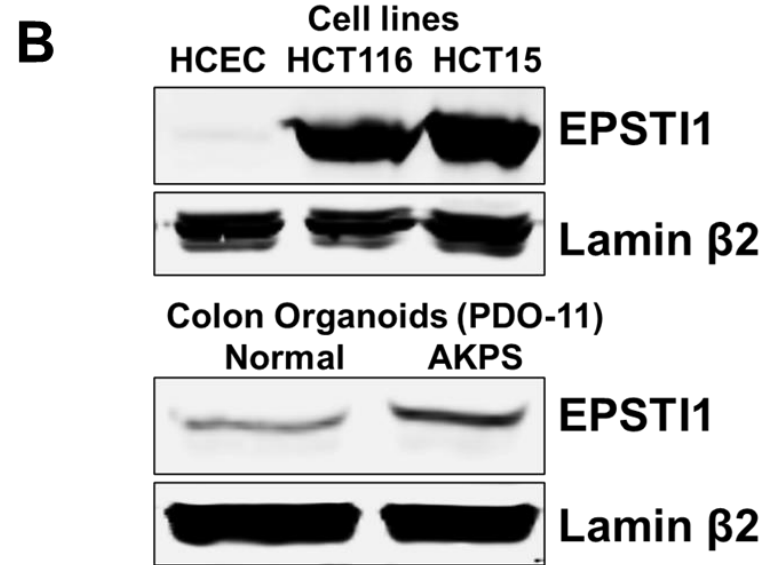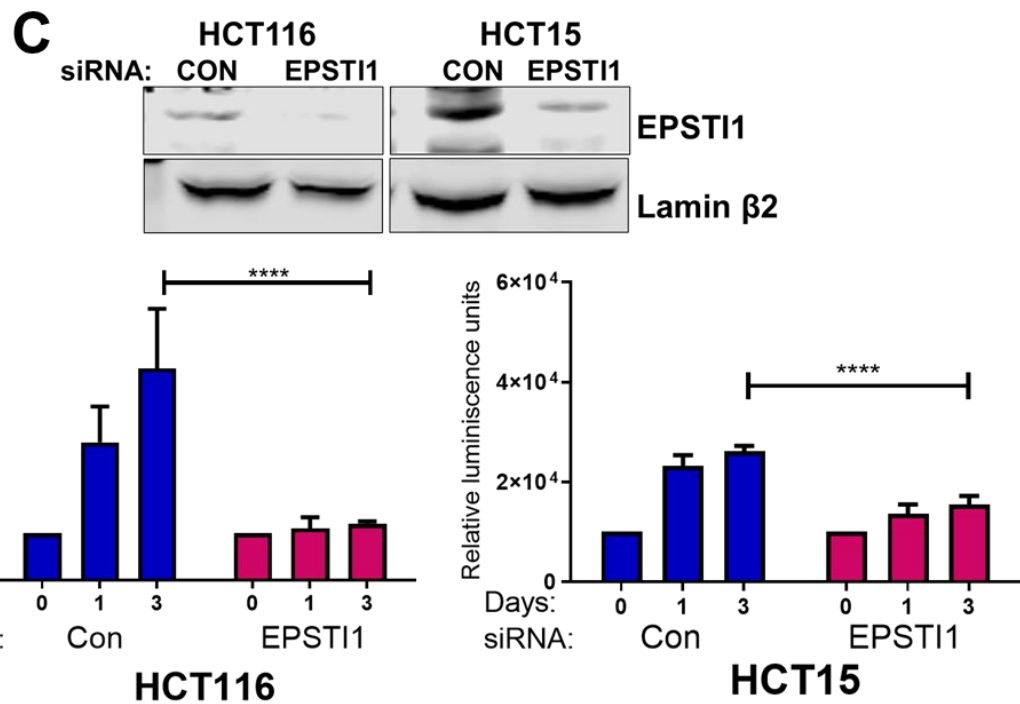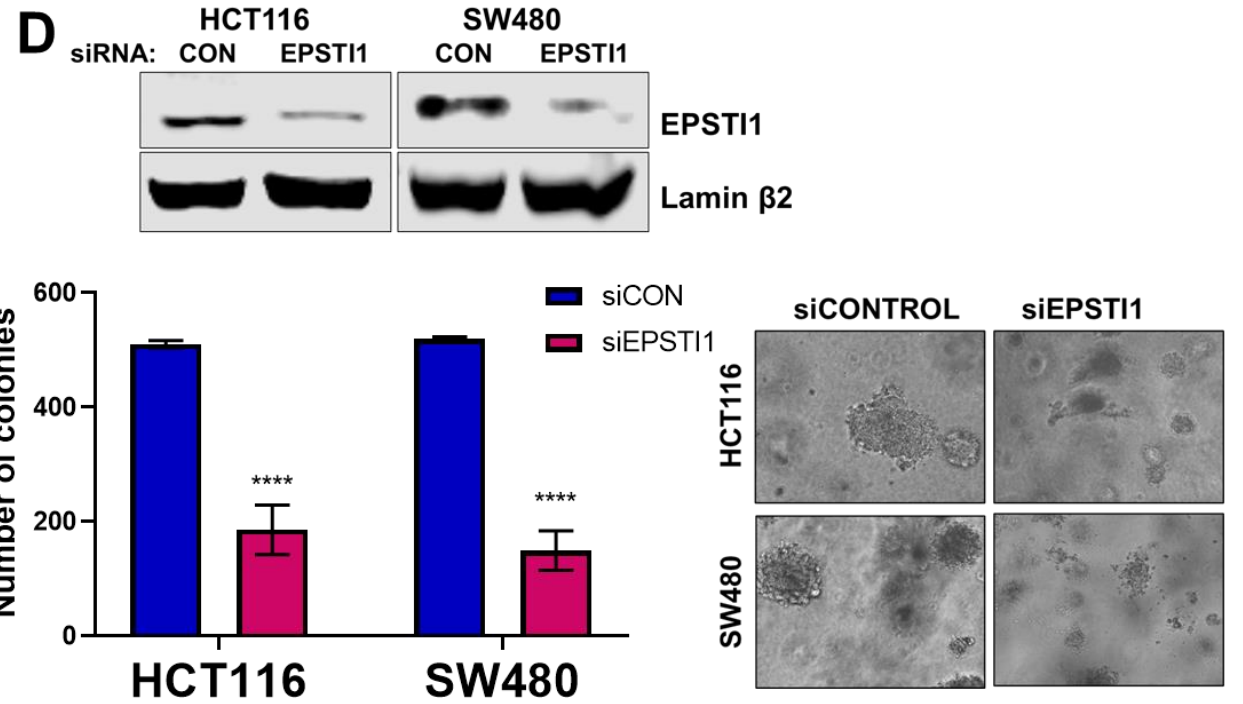

**A**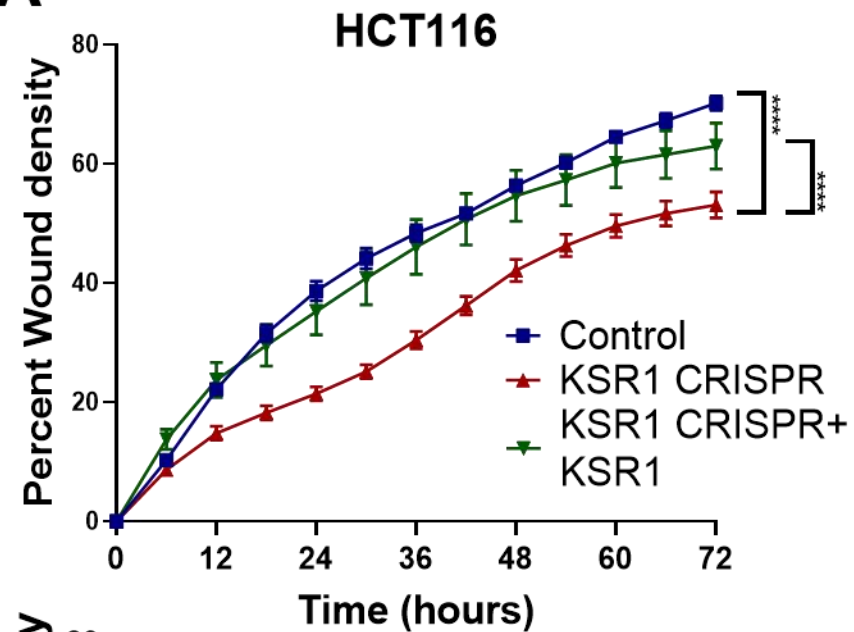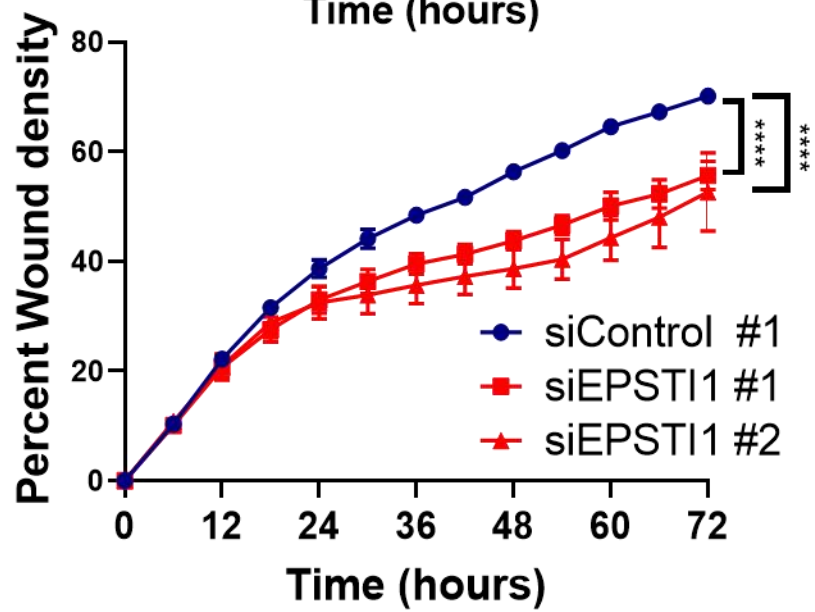**B**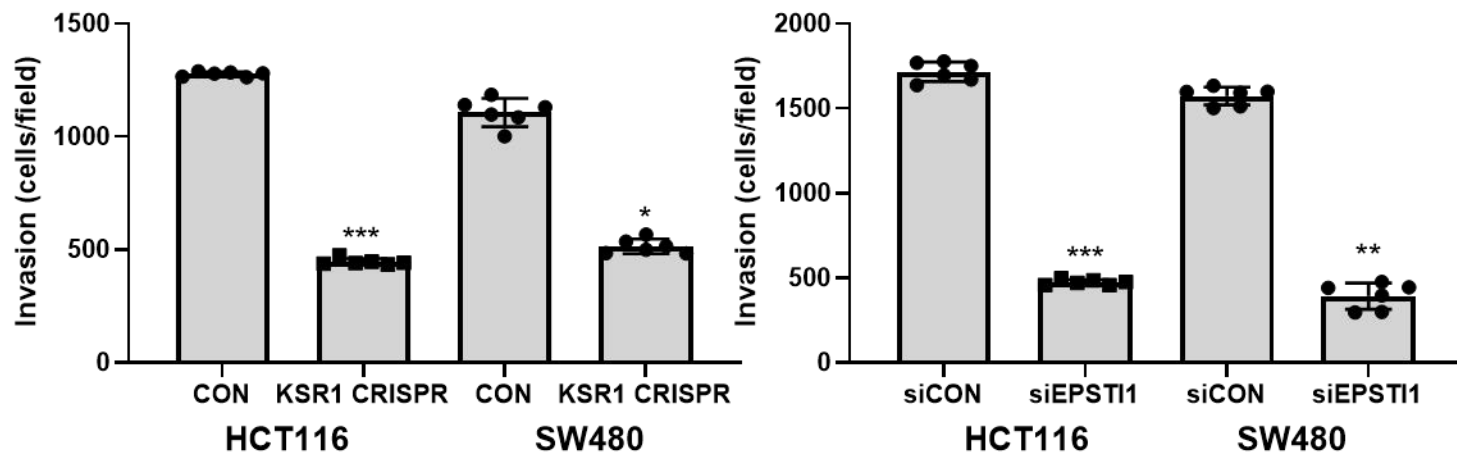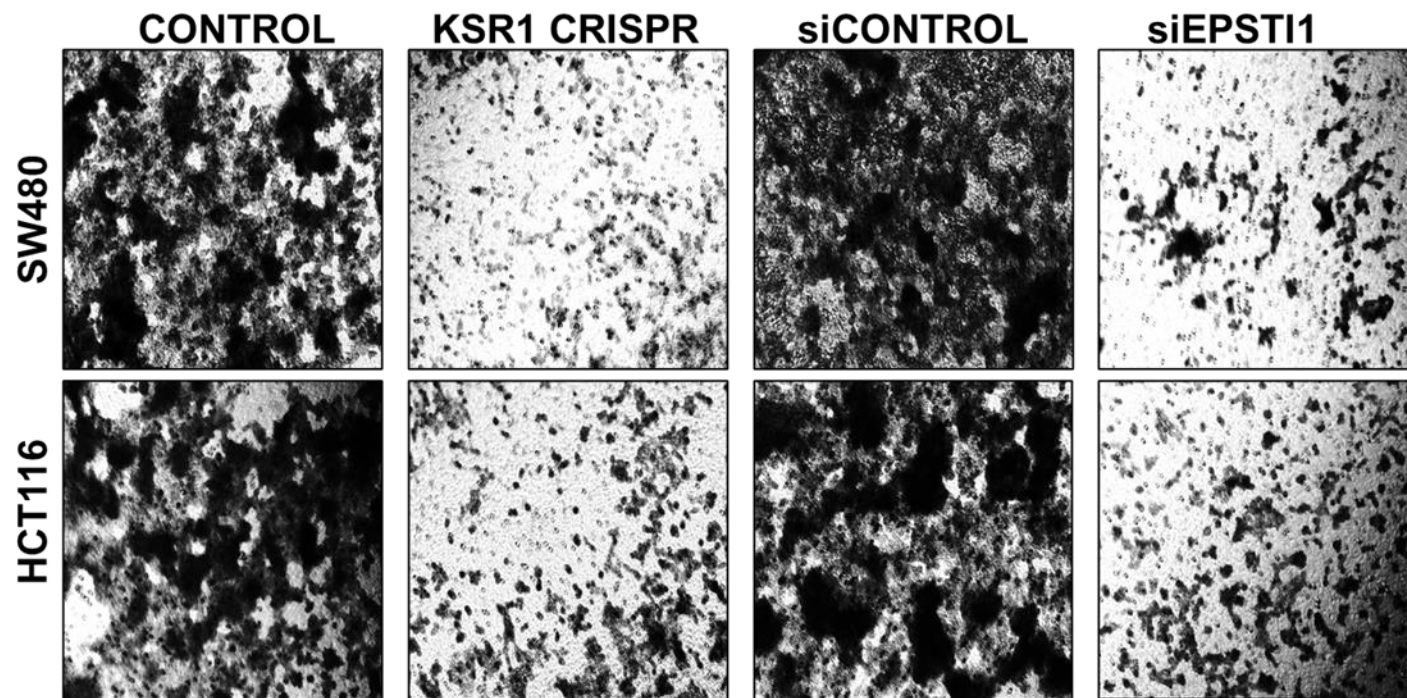



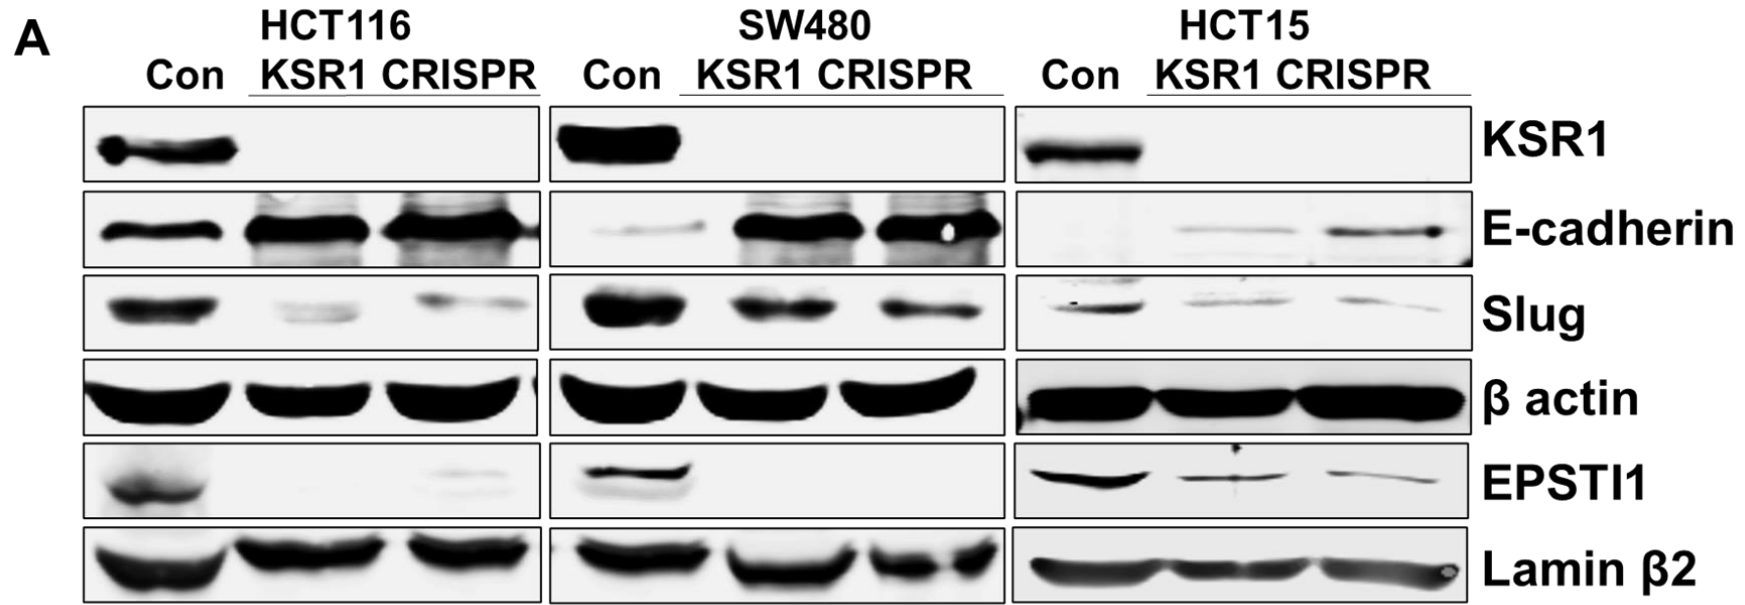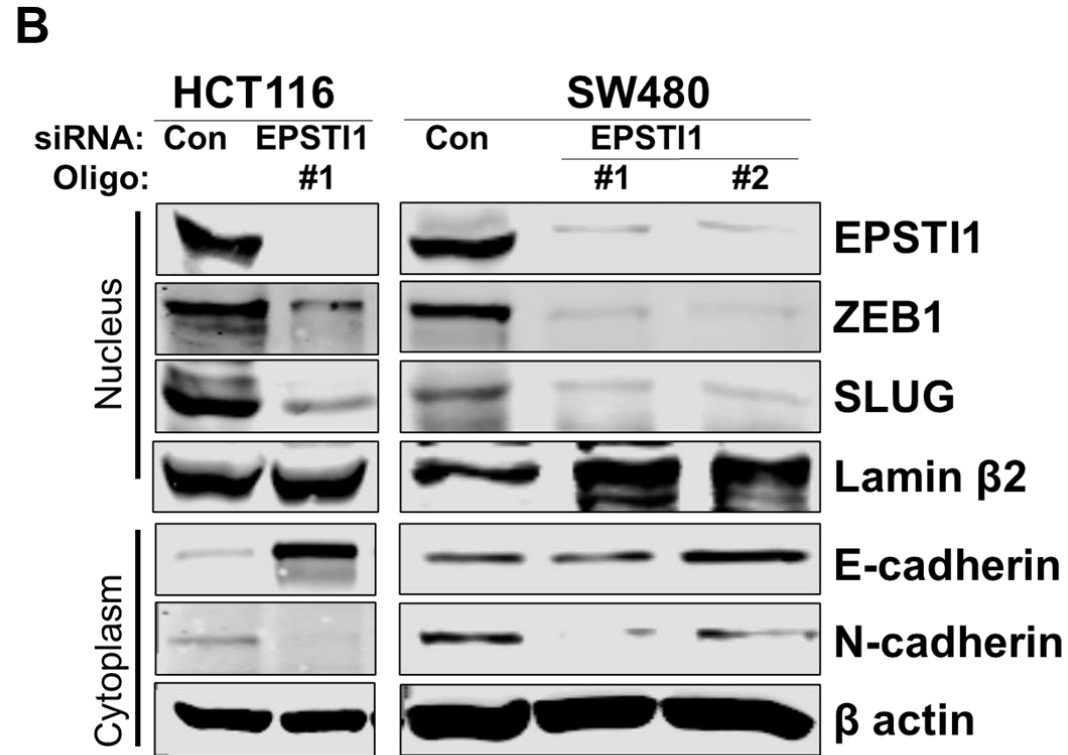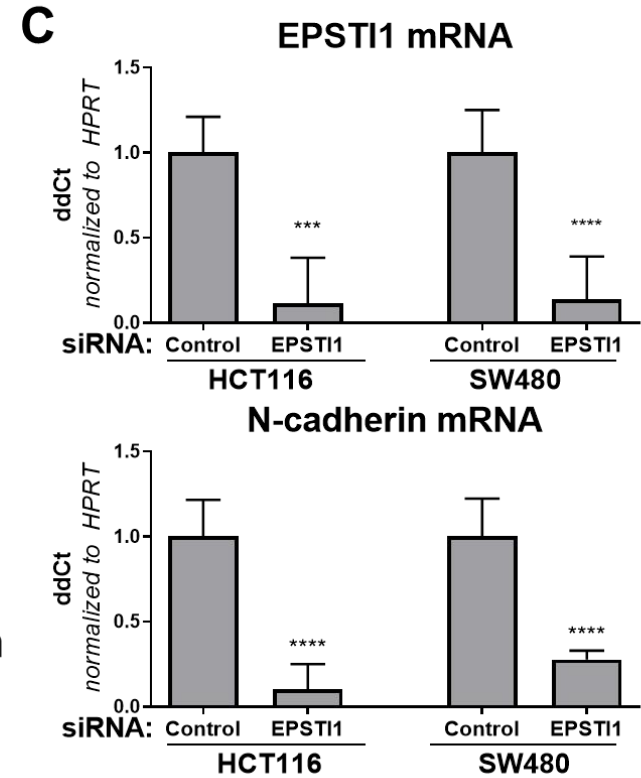



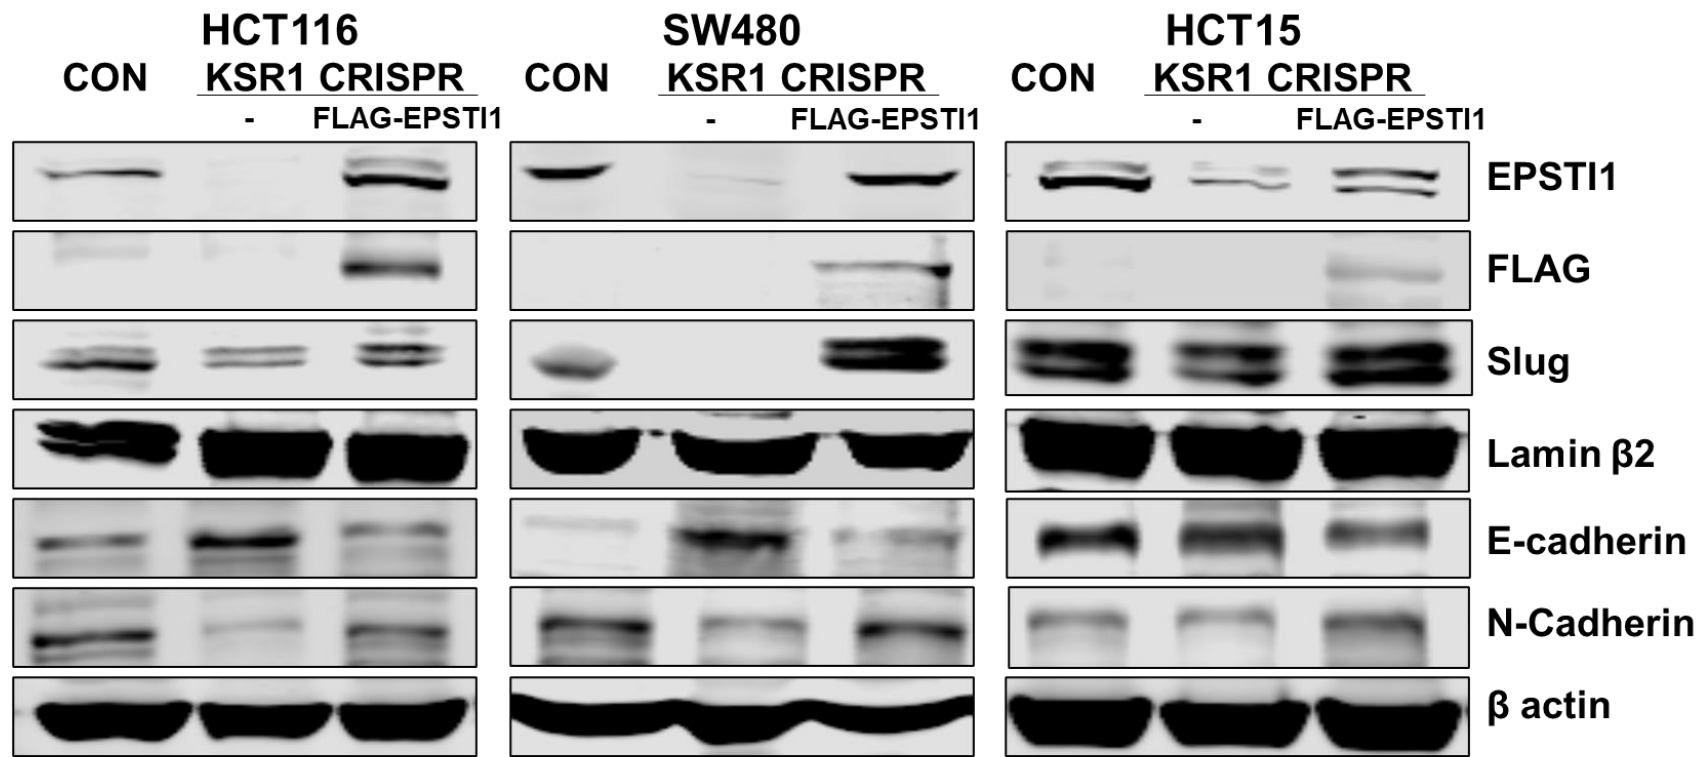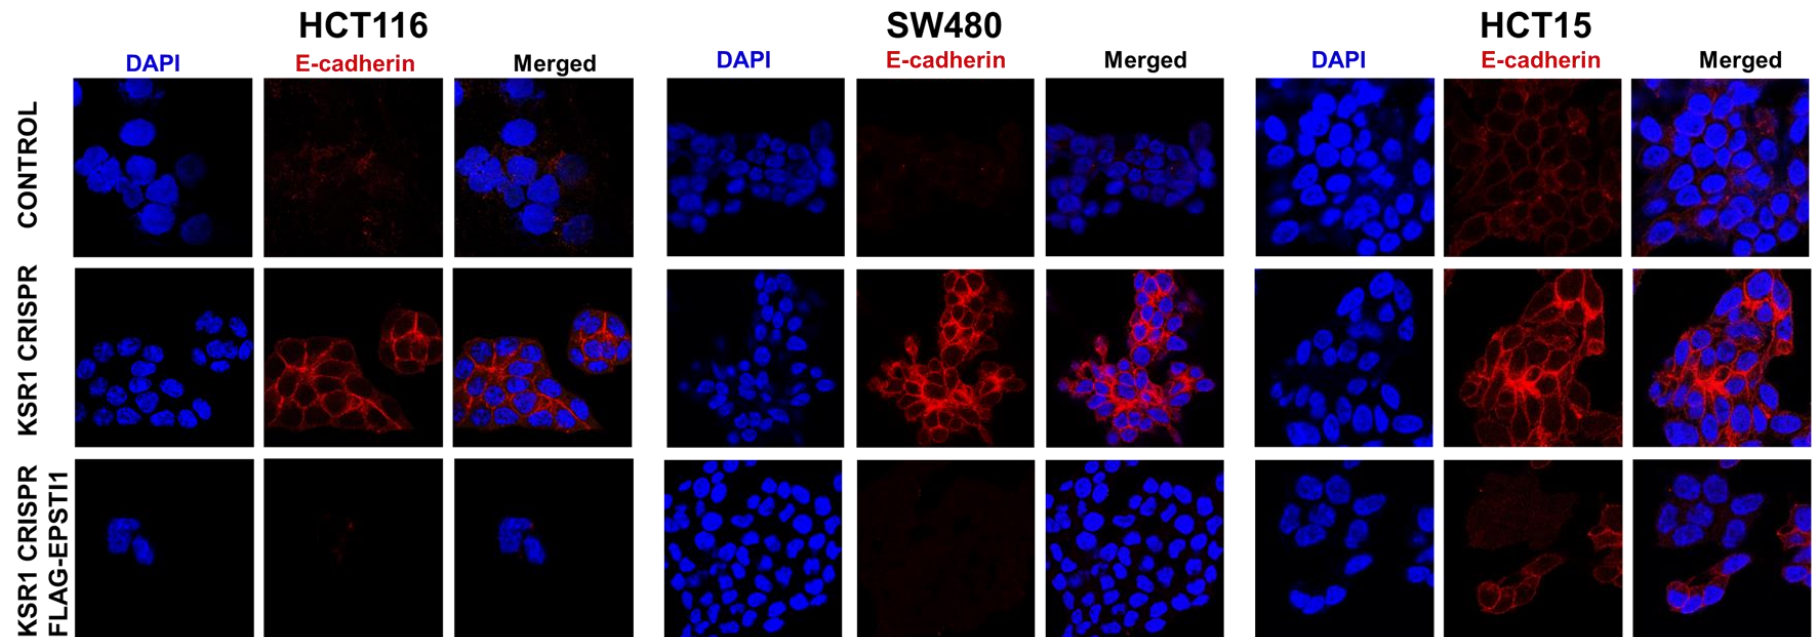

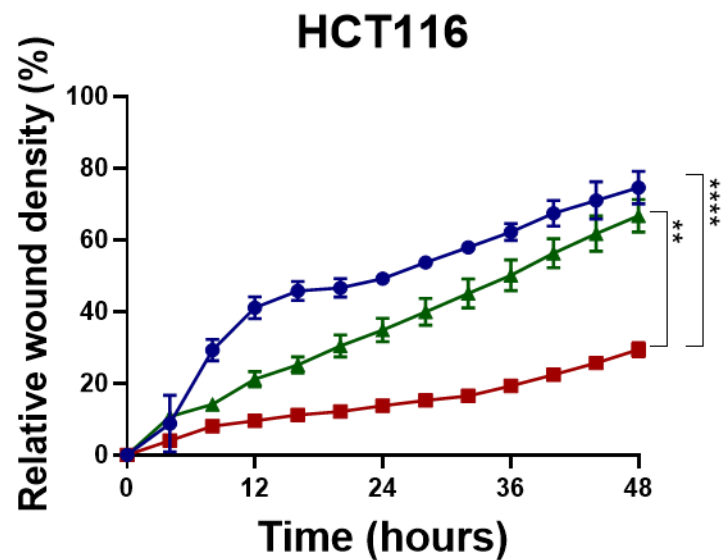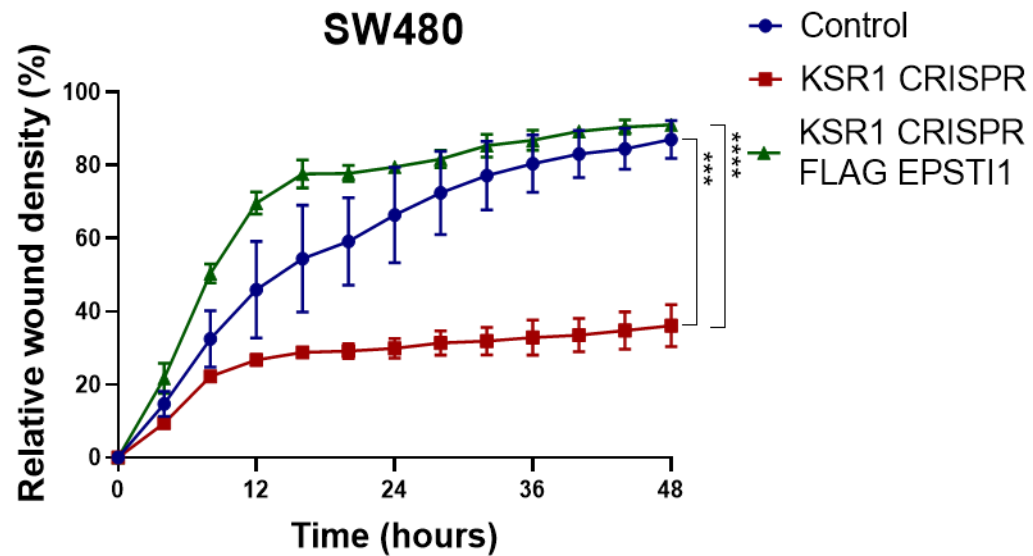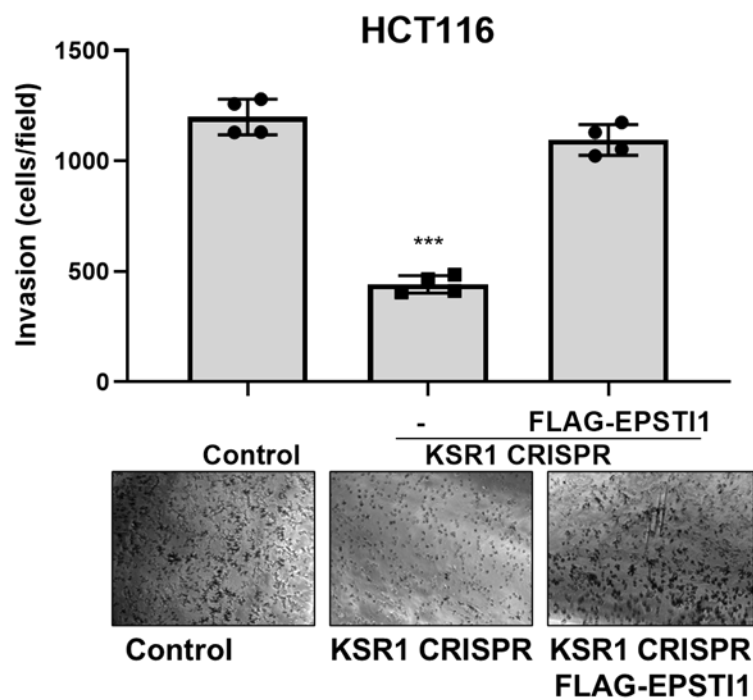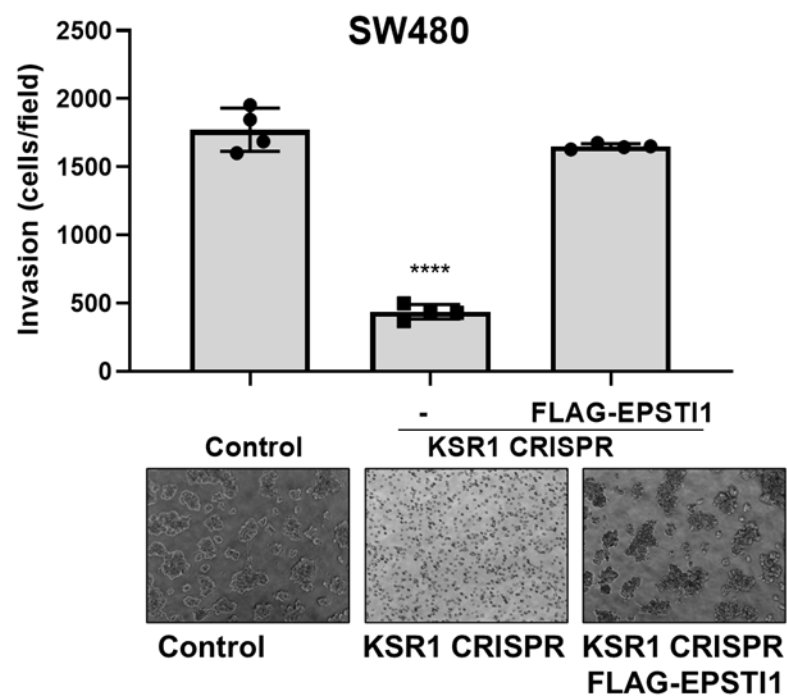

**A**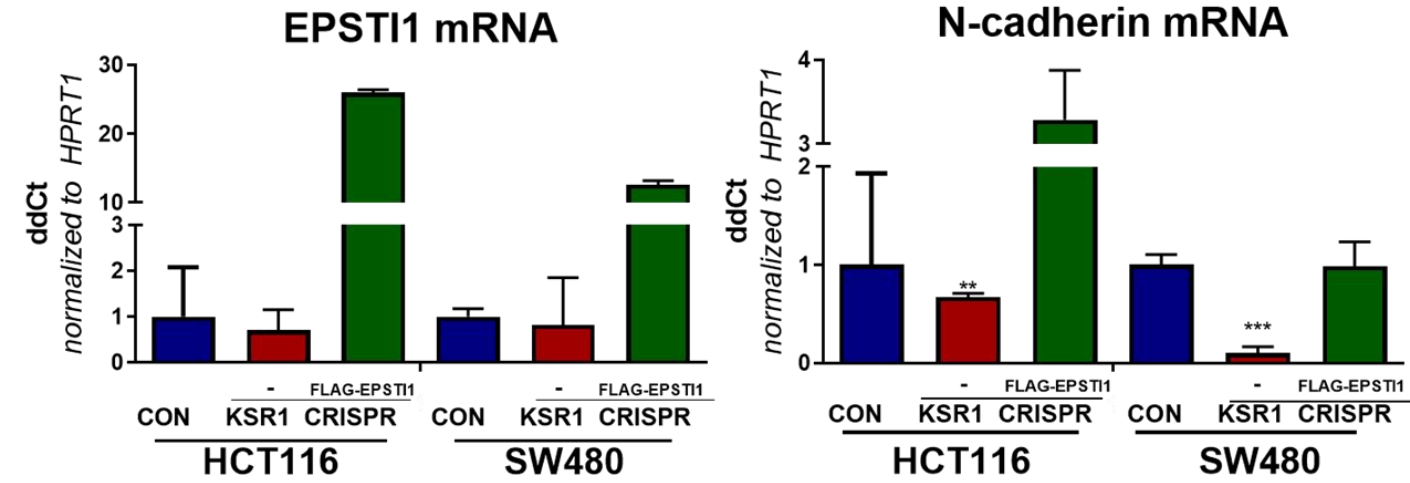**C**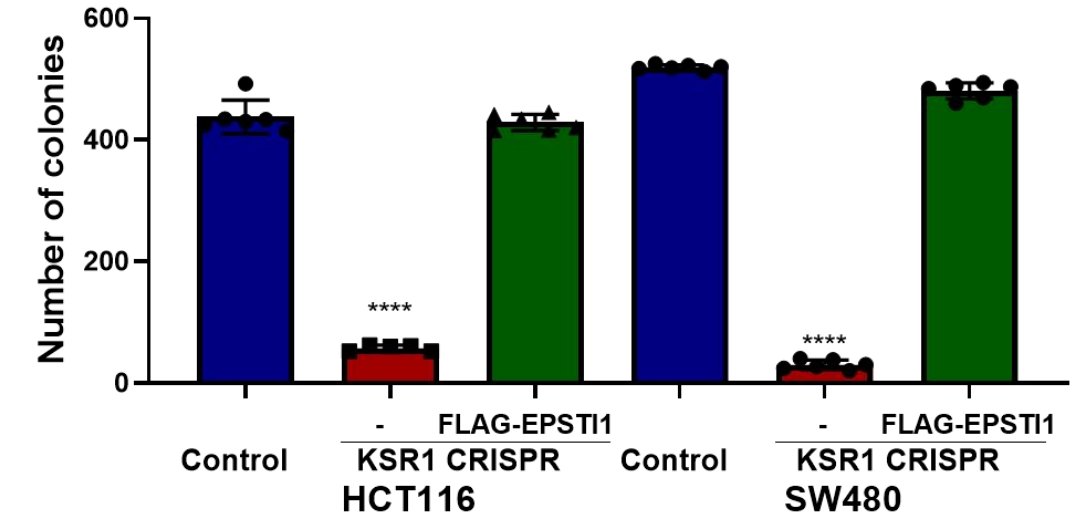**B**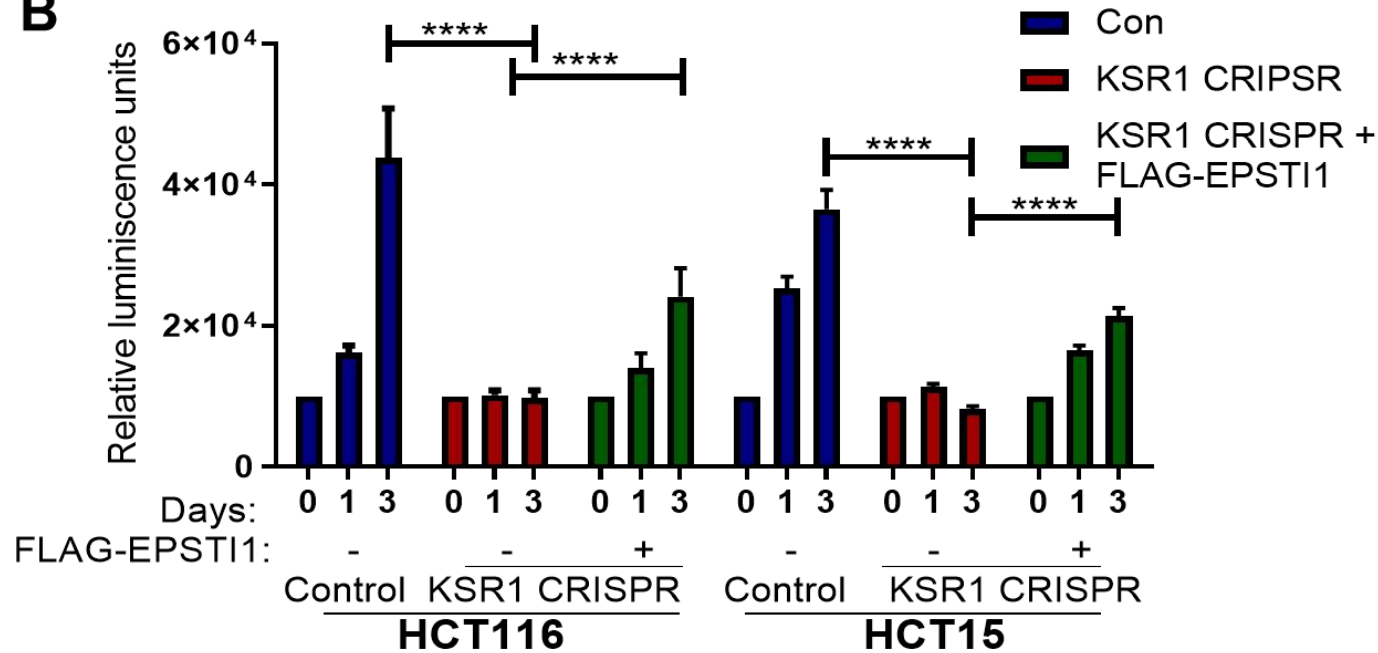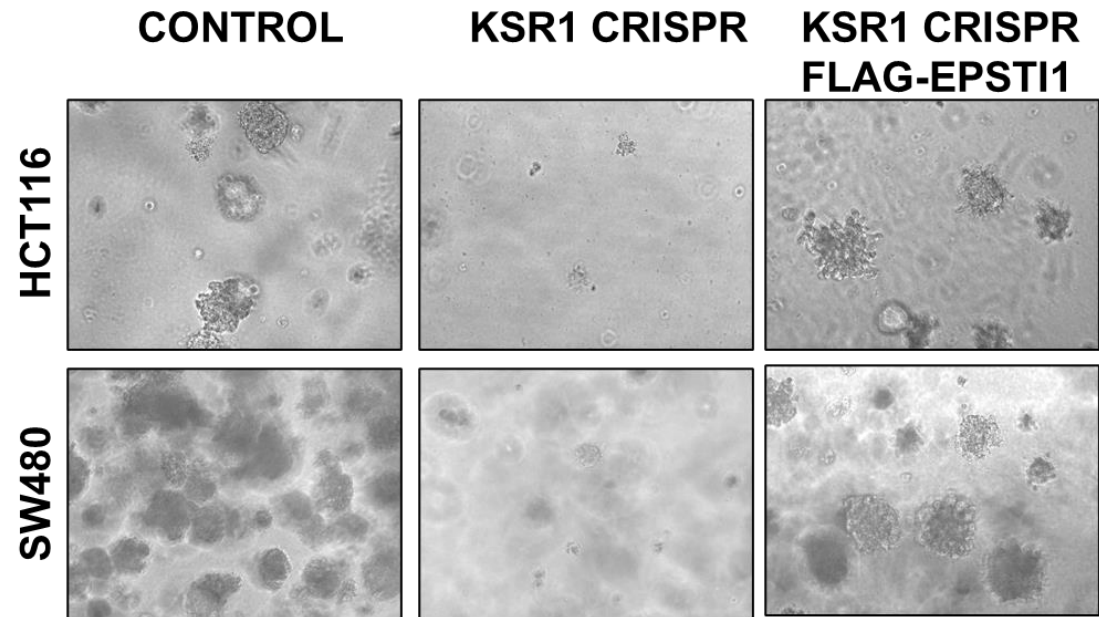

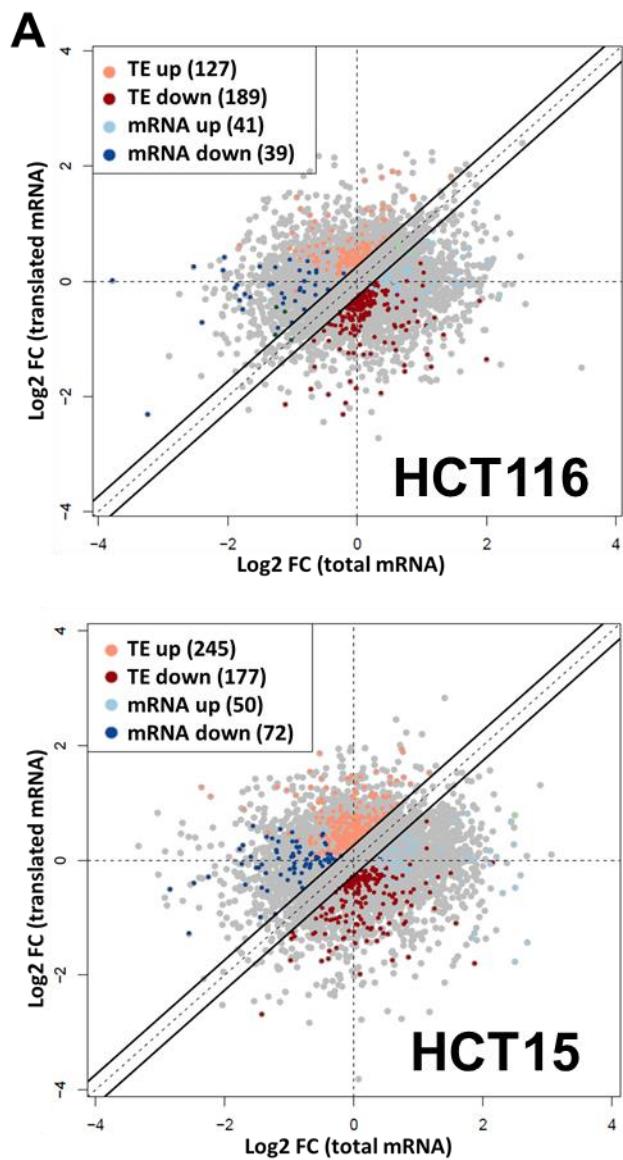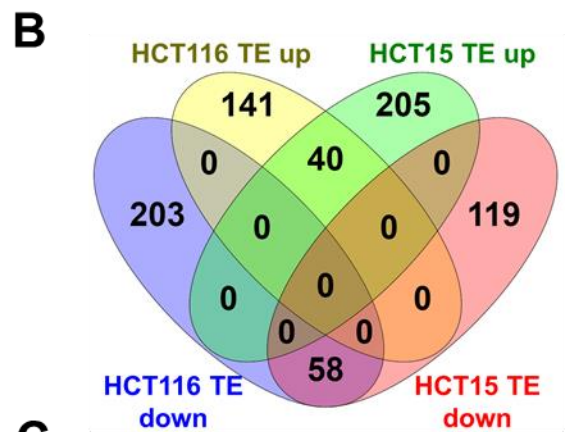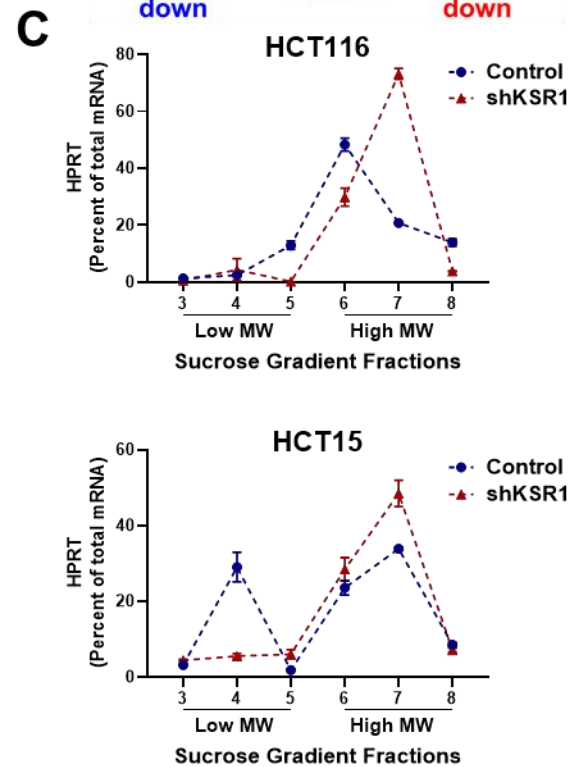

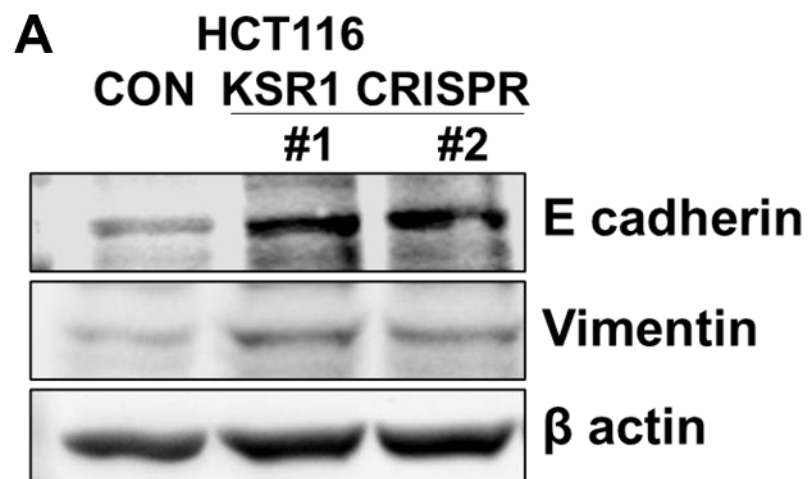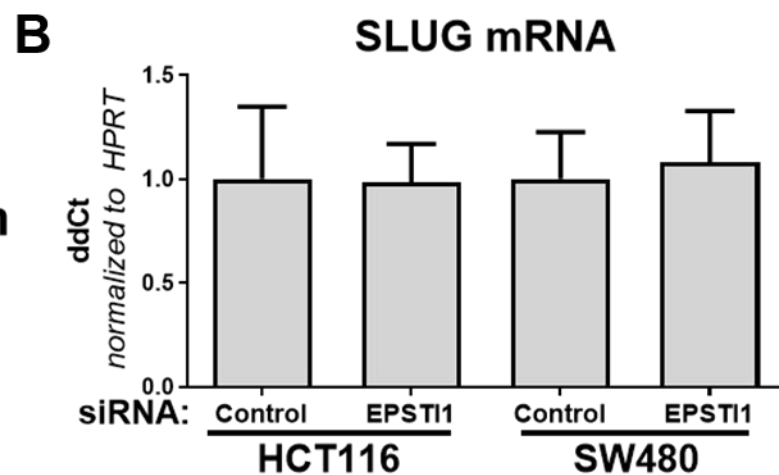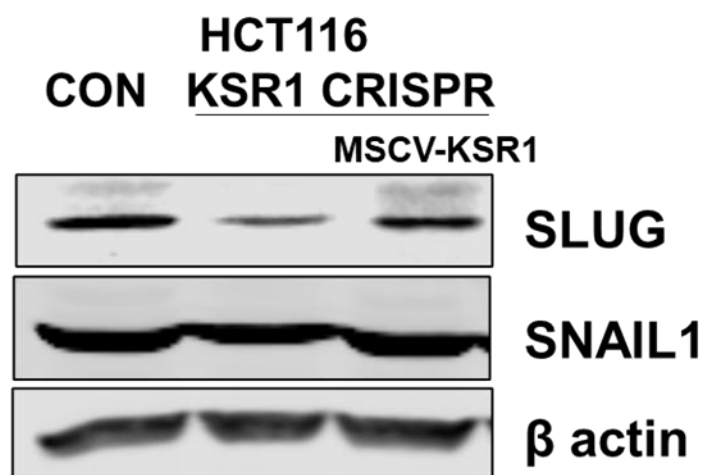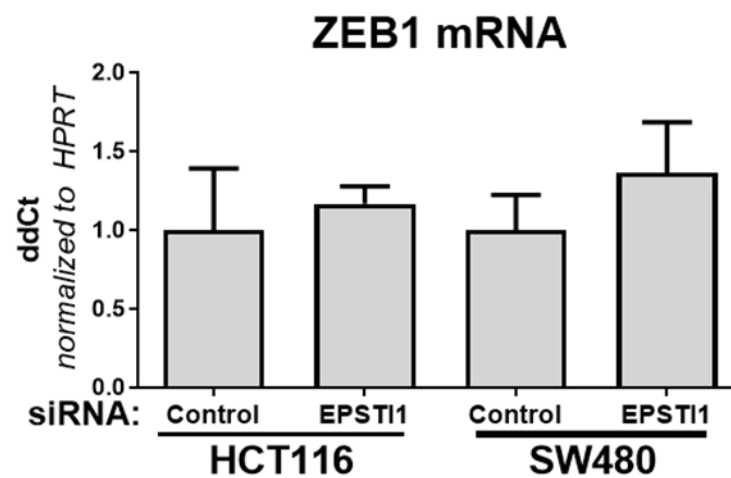

Source: http://biorxiv.org/content/10.1101/2021.01.18.427224v1.full.pdf
